# Supplementary material for: Microbial transformation of methyl cyperenoate by Cunninghamella elegans AS 3.2028 and the antithrombotic activities of its metabolites
Source: Royal Society of Chemistry journal article supplement (doi:10.1039/c6ra24332k), 2016-01-01
Supplement: c6ra24332k1.pdf [file c6ra24332k1.pdf]

## Supporting information

### **Microbial transformation of methyl cyperenoate by *Cunninghamella elegans* AS 3.2028 and the antithrombotic activities of its metabolites**

Jin-Long Tian <sup>a, b</sup>, Yu Chen <sup>c</sup>, Yu-Xi Wang <sup>a, b</sup>, Xiao-Xiao Huang <sup>a, b</sup>, Xue Sun <sup>a, b</sup>, Ke-Chun Liu<sup>d</sup>, Shao-Jiang Song <sup>a, b\*</sup>

<sup>a</sup>. *School of Traditional Chinese Materia Medica, Shenyang Pharmaceutical University, Shenyang 110016, People's Republic of China. E-mail: songsj99@163.com; Fax: +86-24-23986088; Tel: +86-24-23986510*

<sup>b</sup>. *Key Laboratory of Structure-Based Drug Design & Discovery (Ministry of Education), Shenyang Pharmaceutical University, Shenyang 110016, People's Republic of China*

<sup>c</sup>. *School of Life Science and Biopharmaceutics, Shenyang Pharmaceutical University, 103 Wenhua Road, Shenyang 110016, People's Republic of China*

<sup>d</sup>. *Biology Institute of Shandong Academy of Sciences, Jinan, China*

\* Correspondence author. Tel./fax: +86 24 23986510 (S.-J. S.)

*E-mail addresses: songsj99@163.com (S.-J. Song)*

## Table of Contents

**Figure S1.**  $^1\text{H}$  NMR spectrum (400 MHz,  $\text{CD}_3\text{OD}-d_4$ ) of compound **1**

**Figure S2.**  $^{13}\text{C}$  NMR spectrum (100 MHz,  $\text{CD}_3\text{OD}-d_4$ ) of compound **1**

**Figure S3.** HMBC spectrum (600 MHz,  $\text{CD}_3\text{OD}-d_4$ ) of compound **1**

**Figure S4.** HSQC spectrum (600 MHz,  $\text{CD}_3\text{OD}-d_4$ ) of compound **1**

**Figure S5.** HRESIMS spectrum of compound **1**

**Figure S6.** IR spectrum of compound **1**

**Figure S7.** UV spectrum of compound **1**

**Figure S8.**  $^1\text{H}$  NMR spectrum (400 MHz,  $\text{CDCl}_3-d$ ) of compound **2**

**Figure S9.**  $^{13}\text{C}$  NMR spectrum (100 MHz,  $\text{CDCl}_3-d$ ) of compound **2**

**Figure S10.** HMBC spectrum (600 MHz,  $\text{CDCl}_3-d$ ) of compound **2**

**Figure S11.** HSQC spectrum (600 MHz,  $\text{CDCl}_3-d$ ) of compound **2**

**Figure S12.** NOESY spectrum (600 MHz,  $\text{CDCl}_3-d$ ) of compound **2**

**Figure S13.** HRESIMS spectrum of compound **2**

**Figure S14.** IR spectrum of compound **2**

**Figure S15.** UV spectrum of compound **2**

**Figure S16.**  $^1\text{H}$  NMR spectrum (400 MHz,  $\text{CD}_3\text{OD}-d_4$ ) of compound **3**

**Figure S17.**  $^{13}\text{C}$  NMR spectrum (100 MHz,  $\text{CD}_3\text{OD}-d_4$ ) of compound **3**

**Figure S18.** HMBC spectrum (600 MHz,  $\text{CD}_3\text{OD}-d_4$ ) of compound **3**

**Figure S19.** HSQC spectrum (600 MHz,  $\text{CD}_3\text{OD}-d_4$ ) of compound **3**

**Figure S20.** HRESIMS spectrum of compound **3**

**Figure S21.** IR spectrum of compound **3**

**Figure S22.** UV spectrum of compound **3**

**Figure S23.**  $^1\text{H}$  NMR spectrum (400 MHz,  $\text{CD}_3\text{OD}-d_4$ ) of compound **4**

**Figure S24.**  $^{13}\text{C}$  NMR spectrum (100 MHz,  $\text{CD}_3\text{OD}-d_4$ ) of compound **4**

**Figure S25.** HMBC spectrum (600 MHz,  $\text{CD}_3\text{OD}-d_4$ ) of compound **4**

**Figure S26.** HSQC spectrum (600 MHz,  $\text{CD}_3\text{OD}-d_4$ ) of compound **4**

**Figure S27.** NOESY spectrum (600 MHz,  $\text{CD}_3\text{OD}-d_4$ ) of compound **4**

**Figure S28.** HRESIMS spectrum of compound **4**

**Figure S29.** IR spectrum of compound **4**

**Figure S30.** UV spectrum of compound **4**

**Figure S31.**  $^1\text{H}$  NMR spectrum (400 MHz,  $\text{CDCl}_3$ -*d*) of compound **5**

**Figure S32.**  $^{13}\text{C}$  NMR spectrum (100 MHz,  $\text{CDCl}_3$ -*d*) of compound **5**

**Figure S33.** HMBC spectrum (600 MHz,  $\text{CDCl}_3$ -*d*) of compound **5**

**Figure S34.** HSQC spectrum (600 MHz,  $\text{CDCl}_3$ -*d*) of compound **5**

**Figure S35.** NOESY spectrum (600 MHz,  $\text{CDCl}_3$ -*d*) of compound **5**

**Figure S36.** HRESIMS spectrum of compound **5**

**Figure S37.** IR spectrum of compound **5**

**Figure S38.** UV spectrum of compound **5**

**Figure S39.**  $^1\text{H}$  NMR spectrum (400 MHz,  $\text{CD}_3\text{OD}$ -*d*<sub>4</sub>) of compound **6**

**Figure S40.**  $^{13}\text{C}$  NMR spectrum (100 MHz,  $\text{CD}_3\text{OD}$ -*d*<sub>4</sub>) of compound **6**

**Figure S41.** HMBC spectrum (600 MHz,  $\text{CD}_3\text{OD}$ -*d*<sub>4</sub>) of compound **6**

**Figure S42.** HSQC spectrum (600 MHz,  $\text{CD}_3\text{OD}$ -*d*<sub>4</sub>) of compound **6**

**Figure S43.** HRESIMS spectrum of compound **6**

**Figure S44.** IR spectrum of compound **6**

**Figure S45.** UV spectrum of compound **6**

**Figure S46.**  $^1\text{H}$  NMR spectrum (400 MHz,  $\text{CD}_3\text{OD}$ -*d*<sub>4</sub>) of compound **7**

**Figure S47.**  $^{13}\text{C}$  NMR spectrum (100 MHz,  $\text{CD}_3\text{OD}$ -*d*<sub>4</sub>) of compound **7**

**Figure S48.** HMBC spectrum (600 MHz,  $\text{CD}_3\text{OD}$ -*d*<sub>4</sub>) of compound **7**

**Figure S49.** HSQC spectrum (600 MHz,  $\text{CD}_3\text{OD}$ -*d*<sub>4</sub>) of compound **7**

**Figure S50.** HRESIMS spectrum of compound **7**

**Figure S51.** IR spectrum of compound **7**

**Figure S52.** UV spectrum of compound **7**

**Figure S53.**  $^1\text{H}$  NMR spectrum (400 MHz,  $\text{CDCl}_3$ -*d*) of compound **8**

**Figure S54.**  $^{13}\text{C}$  NMR spectrum (100 MHz,  $\text{CDCl}_3$ -*d*) of compound **8**

**Figure S55.** HMBC spectrum (600 MHz,  $\text{CDCl}_3$ -*d*) of compound **8**

**Figure S56.** HSQC spectrum (600 MHz,  $\text{CDCl}_3$ -*d*) of compound **8**

**Figure S57.** NOESY spectrum (600 MHz,  $\text{CDCl}_3$ -*d*) of compound **8**

**Figure S58.** HRESIMS spectrum of compound **8**

**Figure S59.** IR spectrum of compound **8**

**Figure S60.** UV spectrum of compound **8**

**Figure S61.**  $^1\text{H}$  NMR spectrum (400 MHz,  $\text{CDCl}_3$ -*d*) of **MC**

**Figure S62.**  $^{13}\text{C}$  NMR spectrum (100 MHz,  $\text{CDCl}_3$ -*d*) of **MC**

**Figure S63.** Enlarge figure of time courses of biotransformation.

**Figure S64.** Comp. **1-3** and ligand bound to endothelial nitric oxide synthase.

**Table S1** Antiplatelet aggregation activity of **MC** and biotransformation derivatives

**1-8** ( $\bar{x} \pm s$ ,  $n = 3$ ).

**Table S2** Moldock Scores of the active compounds **1-3** and the ligand of eNOS.

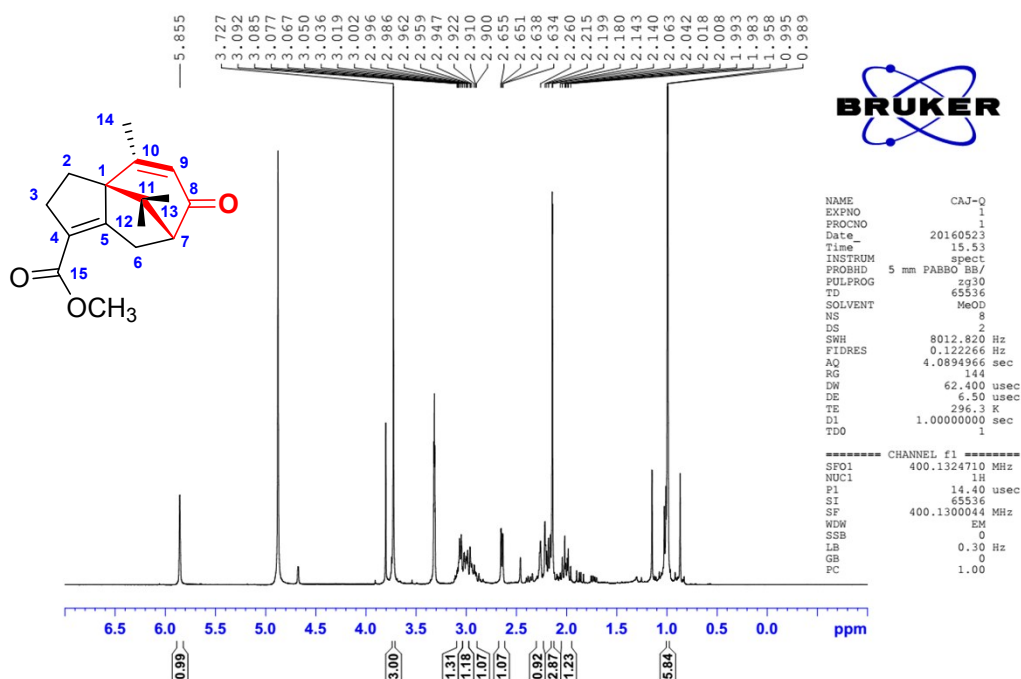

**Figure S1.** <sup>1</sup>H NMR spectrum (400 MHz, CD<sub>3</sub>OD-*d*<sub>4</sub>) of compound **1**

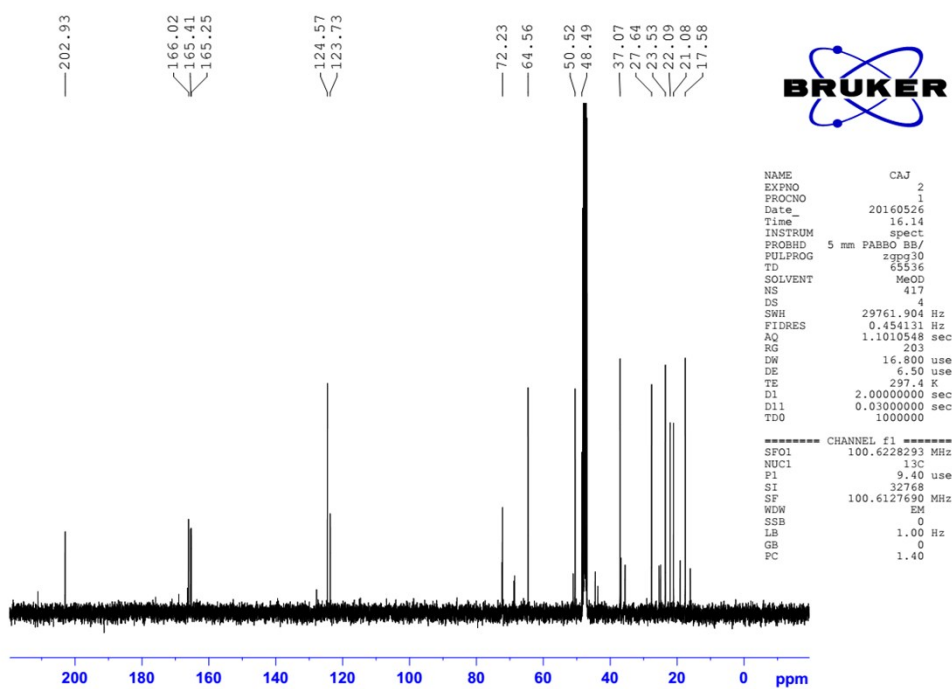

**Figure S2.** <sup>13</sup>C NMR spectrum (100 MHz, CD<sub>3</sub>OD-*d*<sub>4</sub>) of compound **1**

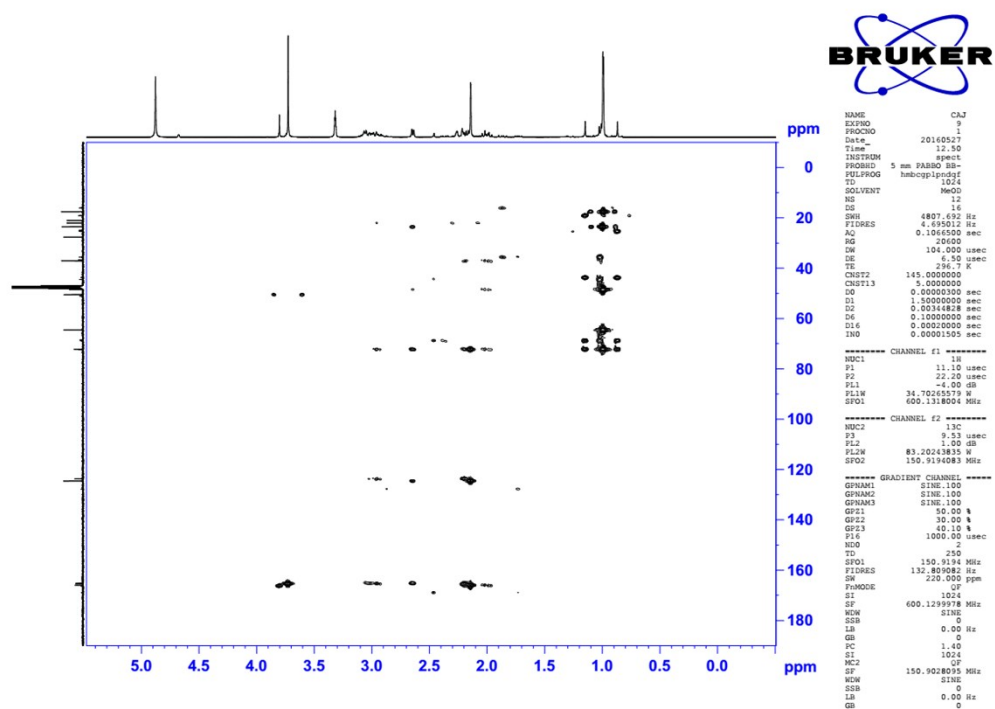

Figure S3. HMBC spectrum (600 MHz, CD<sub>3</sub>OD-*d*<sub>4</sub>) of compound 1

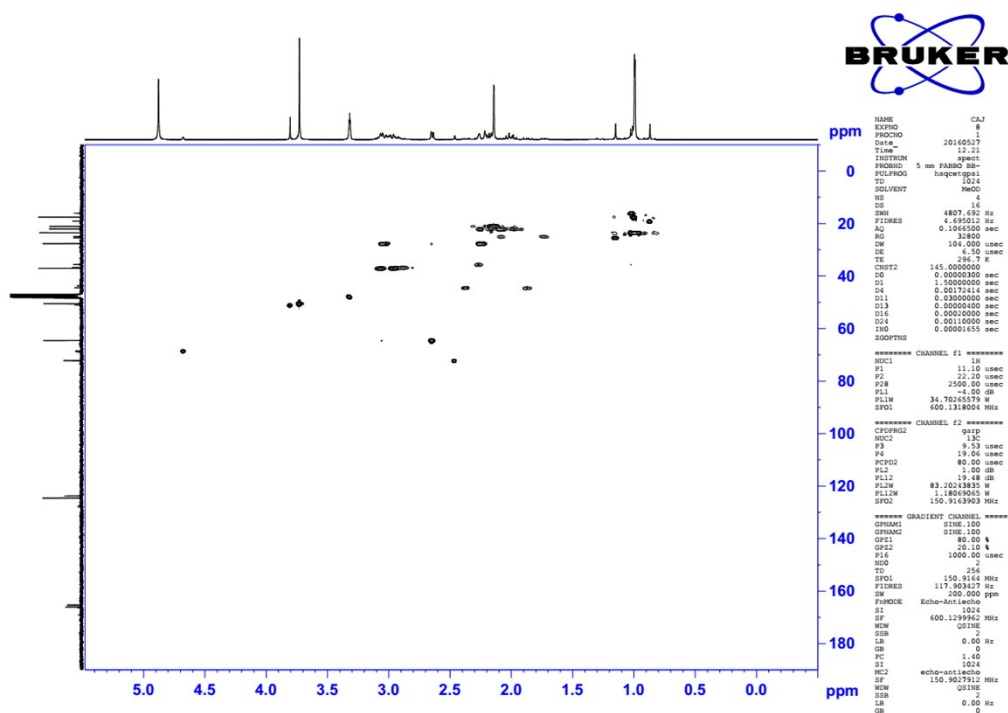

Figure S4. HSQC spectrum (600 MHz, CD<sub>3</sub>OD-*d*<sub>4</sub>) of compound 1

## Mass Spectrum Molecular Formula Report

### Analysis Info

Analysis Name D:\Data\20160527ceyang\CAJ-Q.d  
Method tune\_wide\_pos.m  
Sample Name CAJ-Q  
Comment

Acquisition Date 5/27/2016 7:29:08 PM

Instrument / Ser# Bruker Customer  
Operator micrOTOF-Q 125

### Acquisition Parameter

|             |          |                       |           |                  |           |
|-------------|----------|-----------------------|-----------|------------------|-----------|
| Source Type | ESI      | Ion Polarity          | Positive  | Set Nebulizer    | 0.3 Bar   |
| Focus       | Active   | Set Capillary         | 4500 V    | Set Dry Heater   | 180 °C    |
| Scan Begin  | 50 m/z   | Set End Plate Offset  | -500 V    | Set Dry Gas      | 4.0 l/min |
| Scan End    | 1000 m/z | Set Collision Cell RF | 400.0 Vpp | Set Divert Valve | Source    |

### Generate Molecular Formula Parameter

|                  |  |                        |         |
|------------------|--|------------------------|---------|
| Formula, min.    |  | Tolerance              | Charge  |
| Formula, max.    |  | Minimum                | Maximum |
| Measured m/z     |  | Electron Configuration |         |
| Check Valence    |  | Minimum                | Maximum |
| Nitrogen Rule    |  |                        |         |
| Filter H/C Ratio |  |                        |         |
| Estimate Carbon  |  |                        |         |

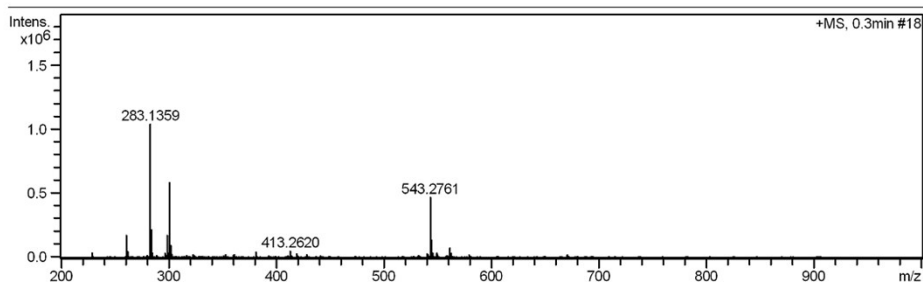

| #  | m/z      | I       |
|----|----------|---------|
| 1  | 229.1202 | 32314   |
| 2  | 261.1550 | 170022  |
| 3  | 262.1495 | 44962   |
| 4  | 283.1359 | 1036972 |
| 5  | 284.1391 | 215560  |
| 6  | 285.1367 | 33594   |
| 7  | 297.1066 | 29682   |
| 8  | 299.1276 | 170452  |
| 9  | 300.1244 | 34374   |
| 10 | 301.1482 | 581229  |
| 11 | 302.1434 | 90722   |
| 12 | 303.0751 | 23132   |
| 13 | 303.1460 | 22624   |
| 14 | 323.1196 | 20062   |
| 15 | 353.2595 | 21438   |
| 16 | 361.1328 | 20390   |
| 17 | 381.1247 | 39312   |
| 18 | 413.2620 | 47246   |
| 19 | 419.1016 | 27183   |
| 20 | 419.1897 | 26200   |
| 21 | 428.1990 | 19384   |
| 22 | 540.2585 | 27121   |
| 23 | 540.7598 | 19058   |
| 24 | 543.2761 | 468072  |
| 25 | 544.2785 | 134848  |

**Figure S5.** HRESIMS spectrum of compound **1**

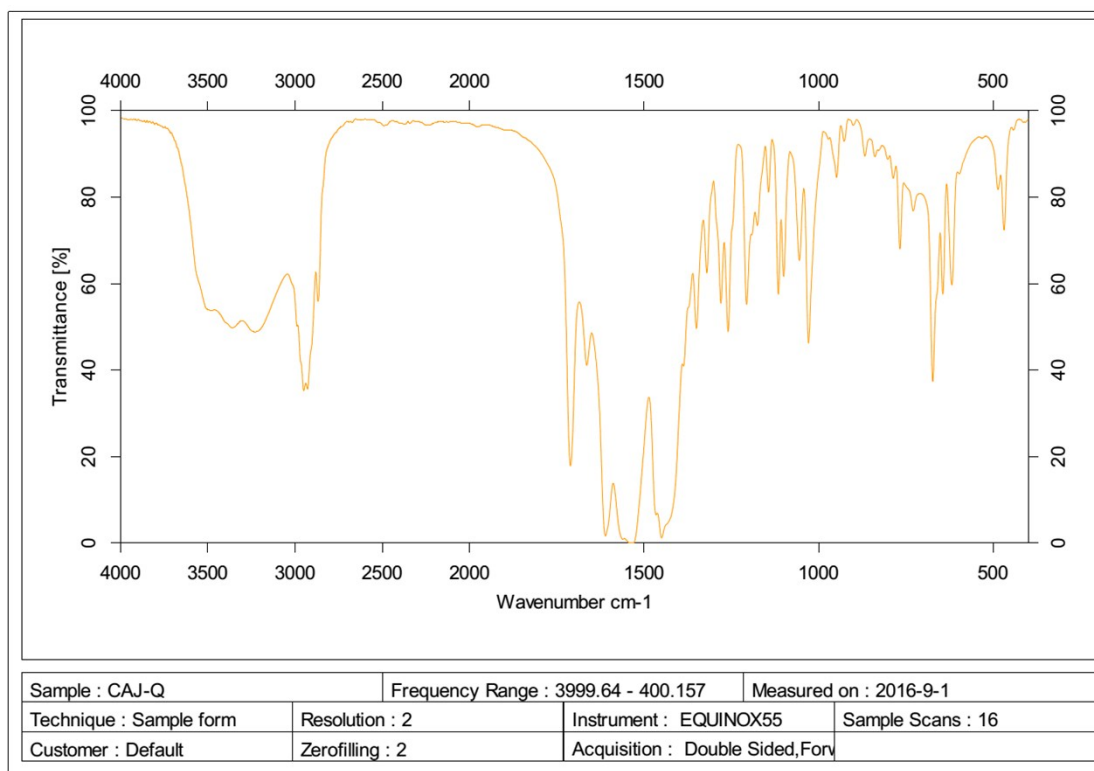

**Figure S6.** IR spectrum of compound **1**

### Spectrum Peak Pick Report

FIELD FIELD TEXT

Data Set: 没有

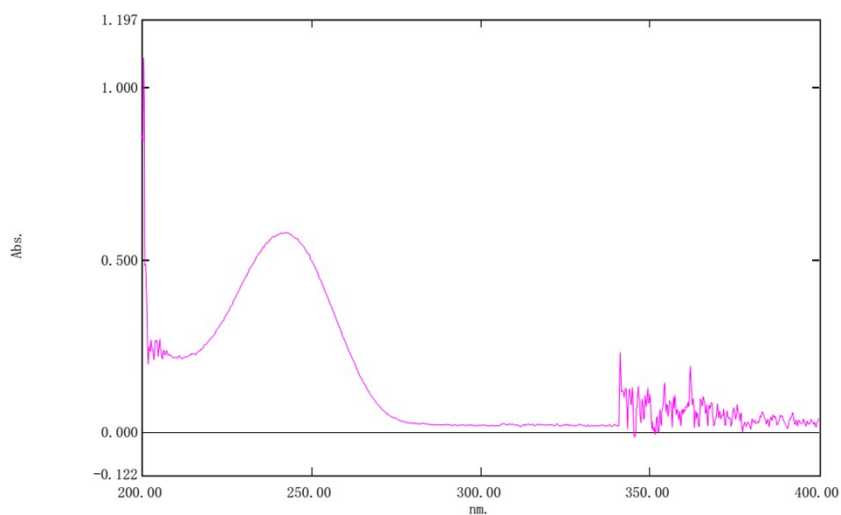

**Figure S7.** UV spectrum of compound **1**

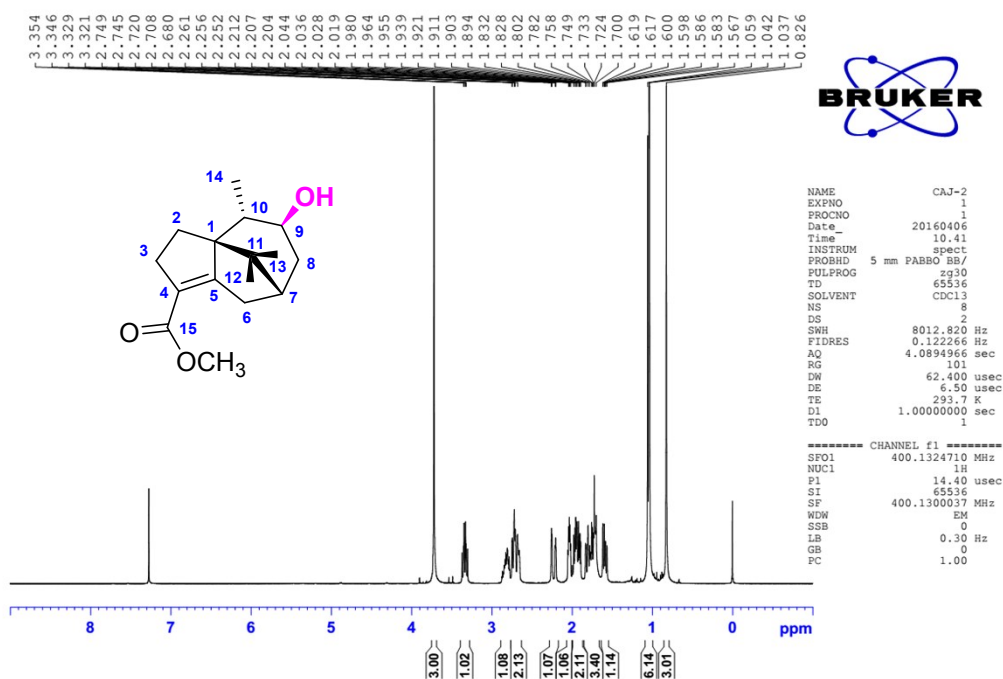

**Figure S8. <sup>1</sup>H NMR spectrum (400 MHz, CDCl<sub>3</sub>-d) of compound 2**

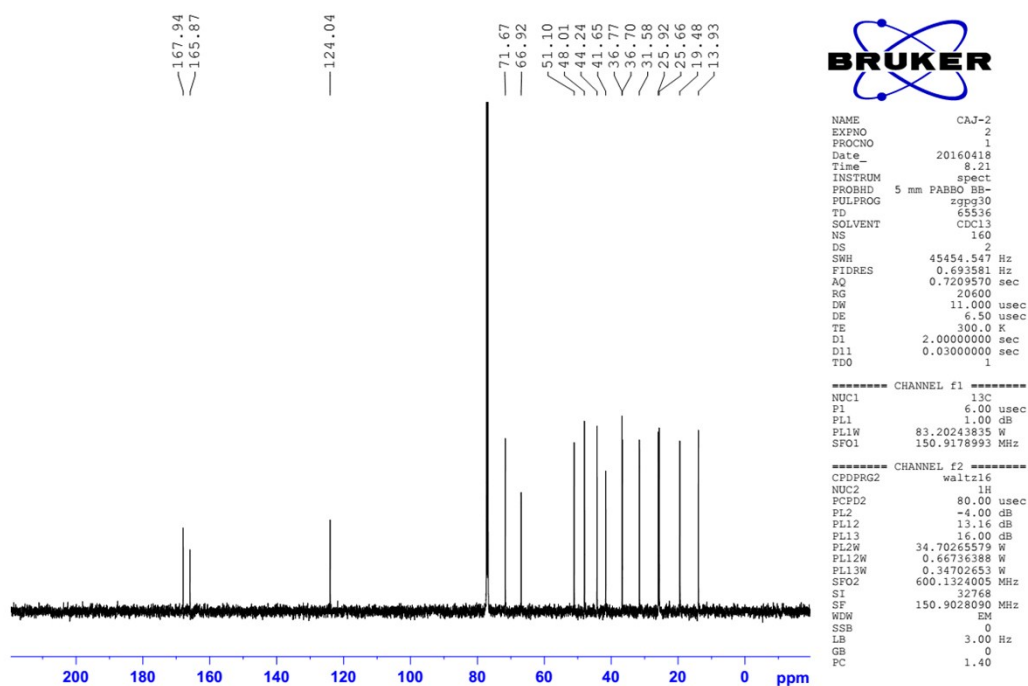

**Figure S9. <sup>13</sup>C NMR spectrum (100 MHz, CDCl<sub>3</sub>-d) of compound 2**

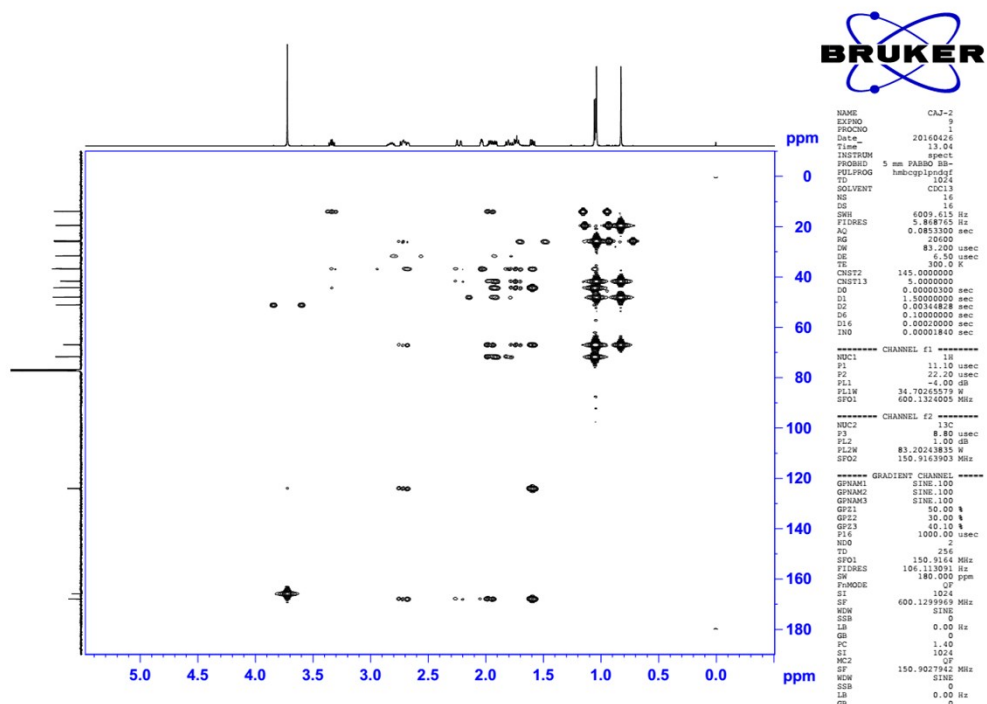

**Figure S10.** HMBC spectrum (600 MHz,  $\text{CDCl}_3\text{-}d$ ) of compound **2**

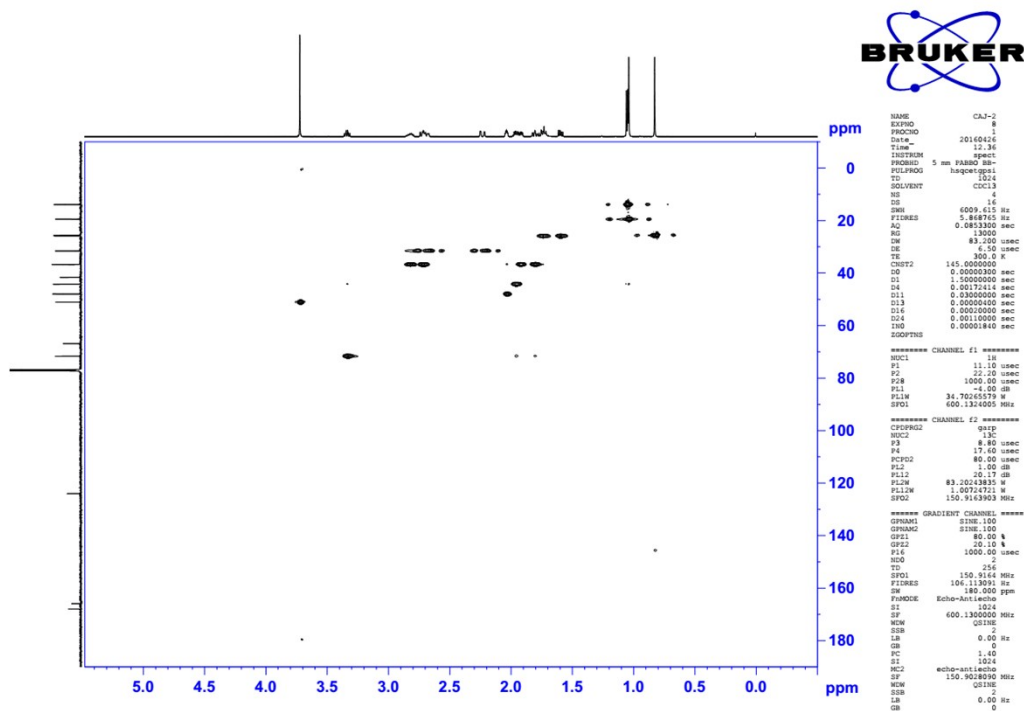

**Figure S11.** HSQC spectrum (600 MHz,  $\text{CDCl}_3\text{-}d$ ) of compound **2**

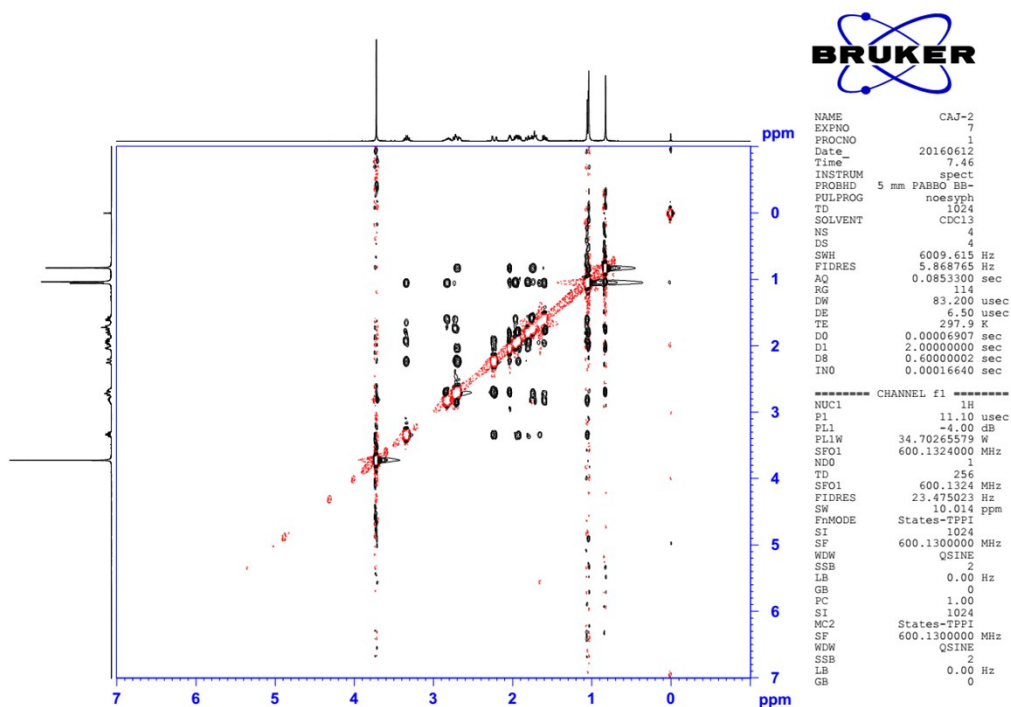

**Figure S12.** NOESY spectrum (600 MHz,  $\text{CDCl}_3\text{-}d$ ) of compound **2**

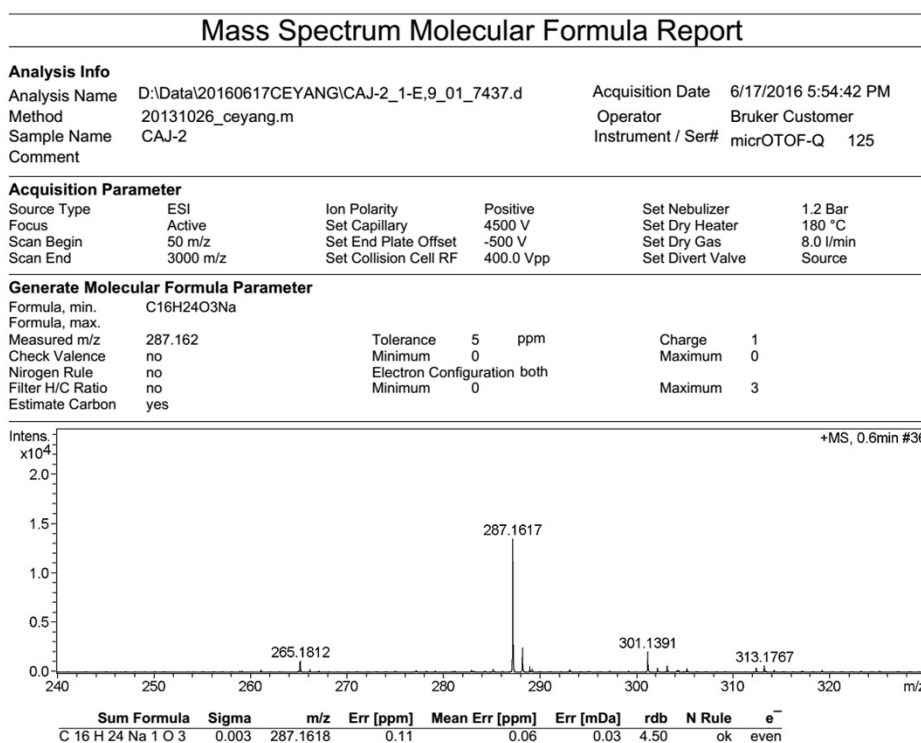

**Figure S13.** HRESIMS spectrum of compound **2**

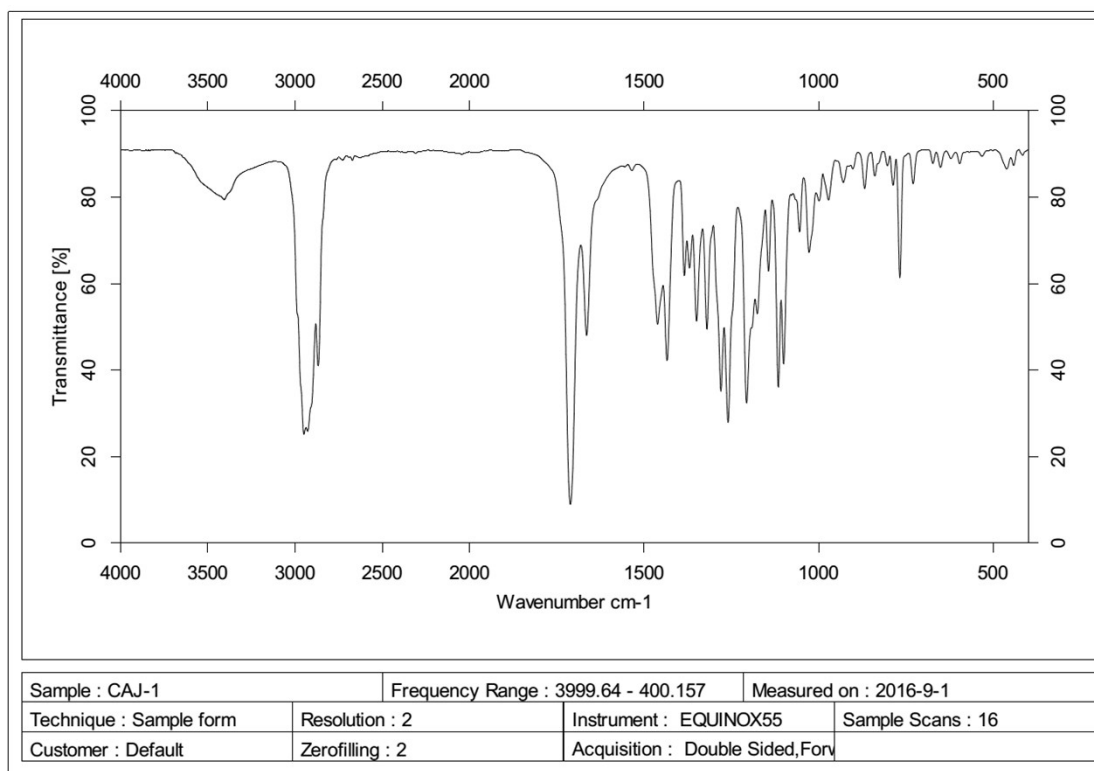

**Figure S14.** IR spectrum of compound **2**

## Spectrum Peak Pick Report

FIELD FIELD TEXT

Data Set: 没有

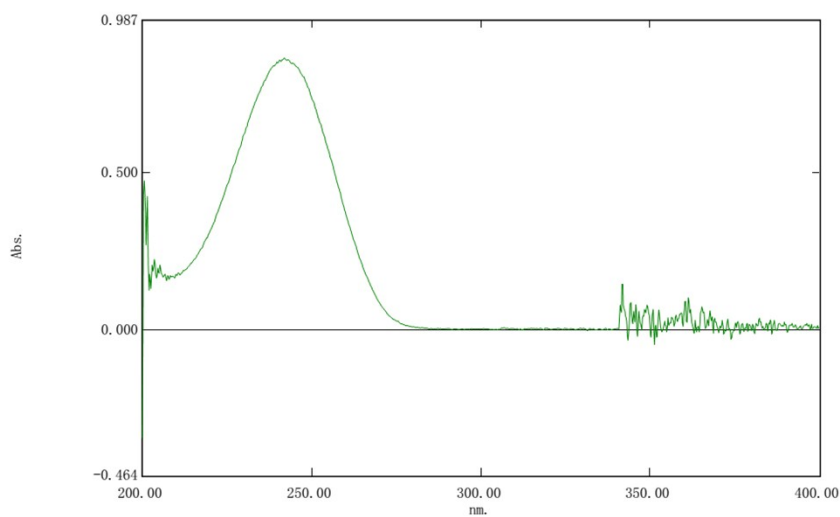

**Figure S15.** UV spectrum of compound **2**

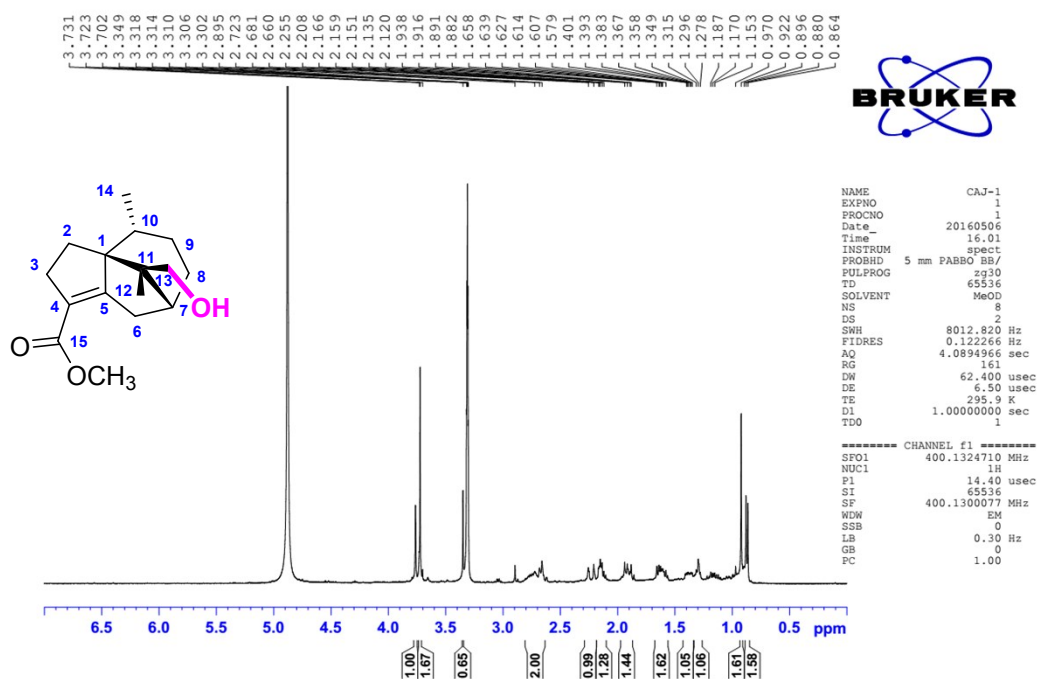

Figure S16.  $^1\text{H}$  NMR spectrum (400 MHz,  $\text{CD}_3\text{OD}-d_4$ ) of compound **3**

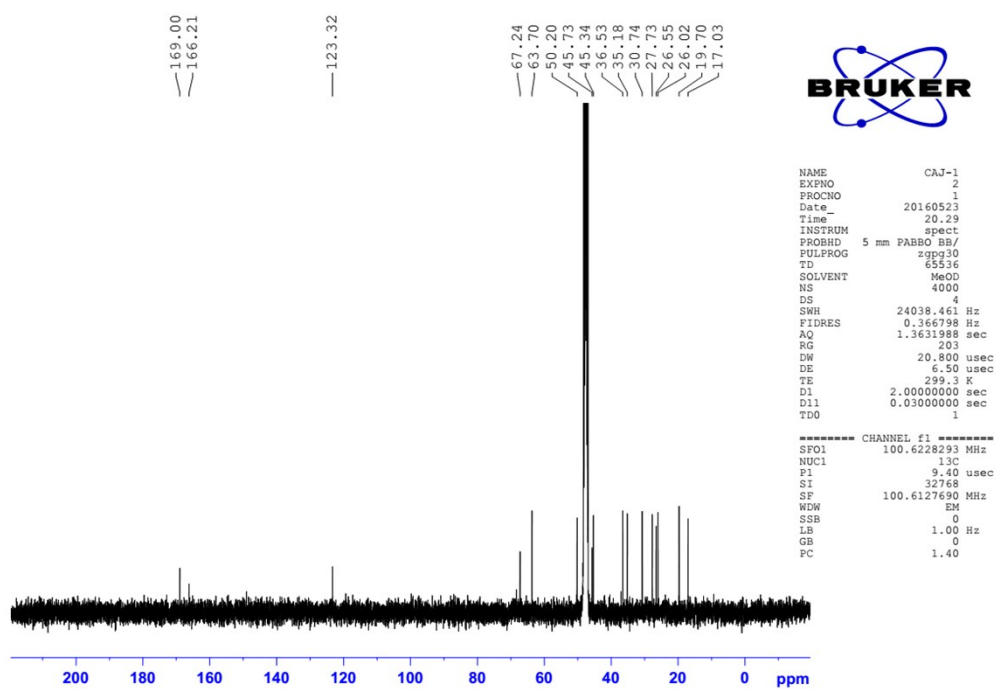

Figure S17.  $^{13}\text{C}$  NMR spectrum (100 MHz,  $\text{CD}_3\text{OD}-d_4$ ) of compound **3**

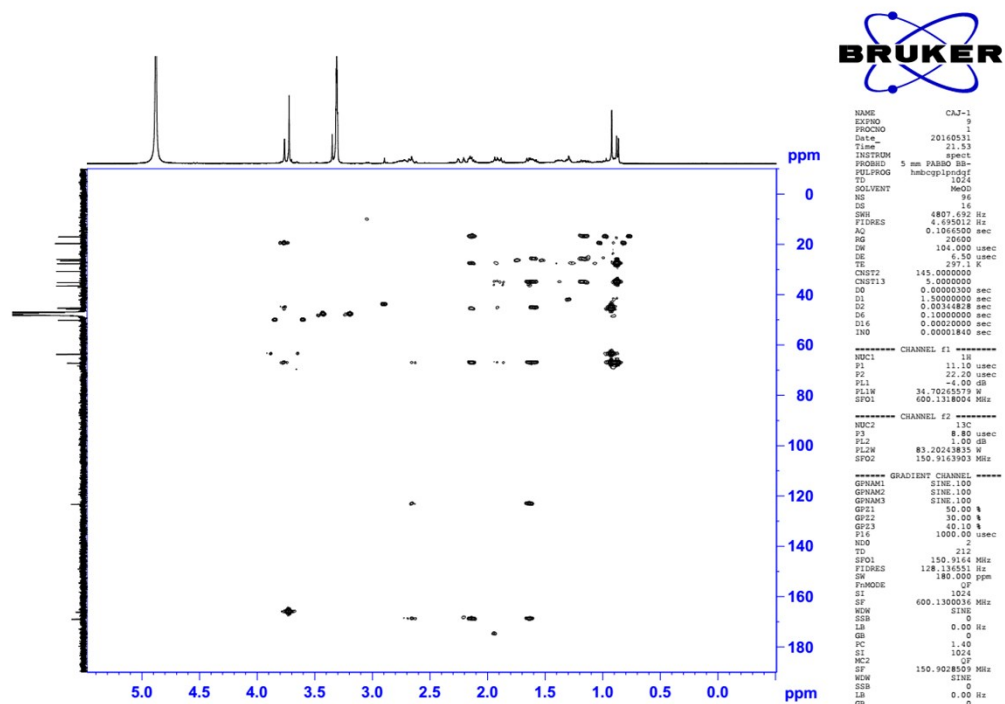

**Figure S18.** HMBC spectrum (600 MHz, CD<sub>3</sub>OD-*d*<sub>4</sub>) of compound **3**

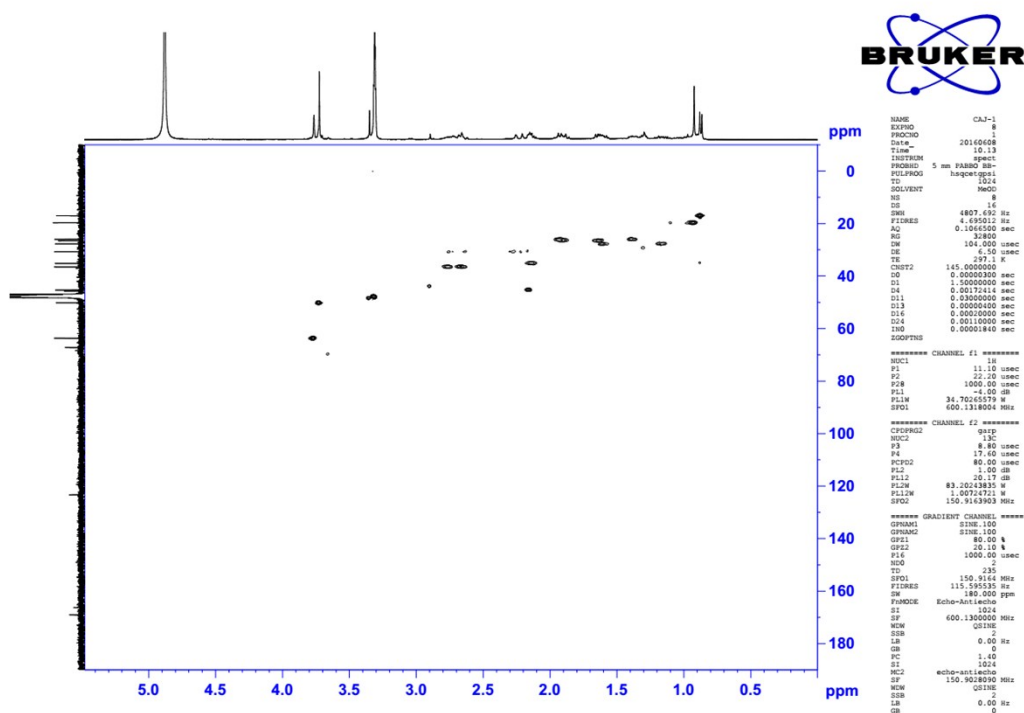

**Figure S19.** HSQC spectrum (600 MHz, CD<sub>3</sub>OD-*d*<sub>4</sub>) of compound **3**

## Mass Spectrum Molecular Formula Report

### Analysis Info

|               |                                              |                   |                      |
|---------------|----------------------------------------------|-------------------|----------------------|
| Analysis Name | D:\Data\20160617CEYANG\CAJ-1_1-F,3_01_7440.d | Acquisition Date  | 6/17/2016 6:07:09 PM |
| Method        | 20131026_ceyang.m                            | Operator          | Bruker Customer      |
| Sample Name   | CAJ-1                                        | Instrument / Ser# | micrOTOF-Q 125       |
| Comment       |                                              |                   |                      |

### Acquisition Parameter

|             |          |                       |           |                  |           |
|-------------|----------|-----------------------|-----------|------------------|-----------|
| Source Type | ESI      | Ion Polarity          | Positive  | Set Nebulizer    | 1.2 Bar   |
| Focus       | Active   | Set Capillary         | 4500 V    | Set Dry Heater   | 180 °C    |
| Scan Begin  | 50 m/z   | Set End Plate Offset  | -500 V    | Set Dry Gas      | 8.0 l/min |
| Scan End    | 3000 m/z | Set Collision Cell RF | 400.0 Vpp | Set Divert Valve | Source    |

### Generate Molecular Formula Parameter

|                  |            |                             |       |
|------------------|------------|-----------------------------|-------|
| Formula, min.    | C16H24O3Na |                             |       |
| Formula, max.    |            |                             |       |
| Measured m/z     | 287.162    | Tolerance                   | 5 ppm |
| Check Valence    | no         | Minimum                     | 0     |
| Nitrogen Rule    | no         | Electron Configuration both |       |
| Filter H/C Ratio | no         | Minimum                     | 0     |
| Estimate Carbon  | yes        | Maximum                     | 3     |

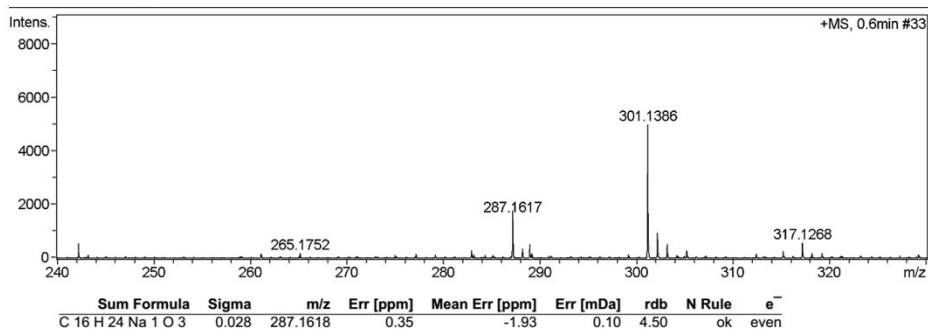

**Figure S20.** HRESIMS spectrum of compound **3**

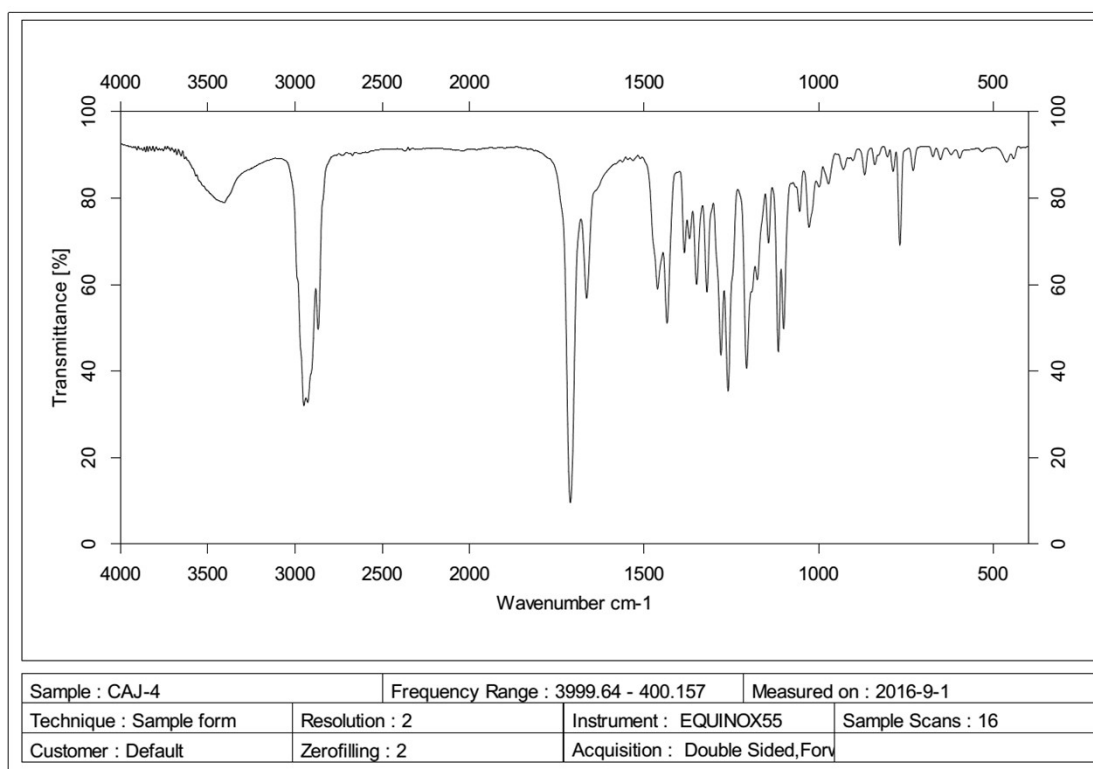

**Figure S21.** IR spectrum of compound **3**

## Spectrum Peak Pick Report

FIELD FIELD TEXT

Data Set: 没有

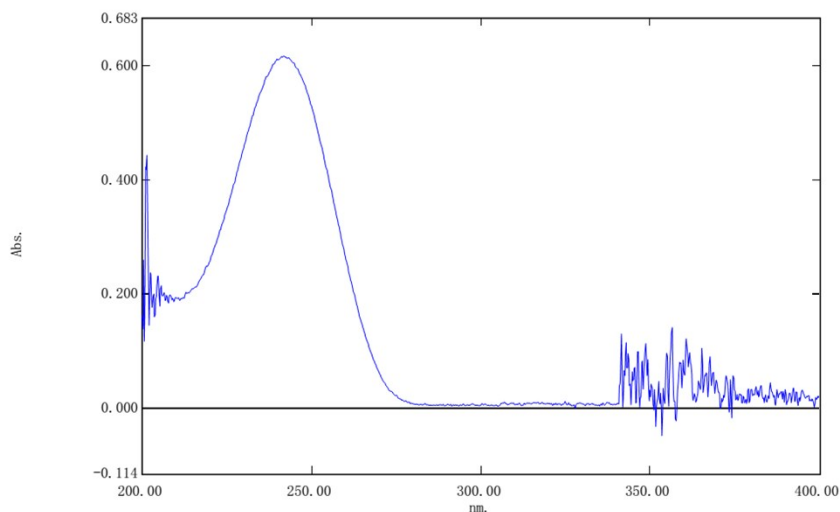

Figure S22. UV spectrum of compound 3

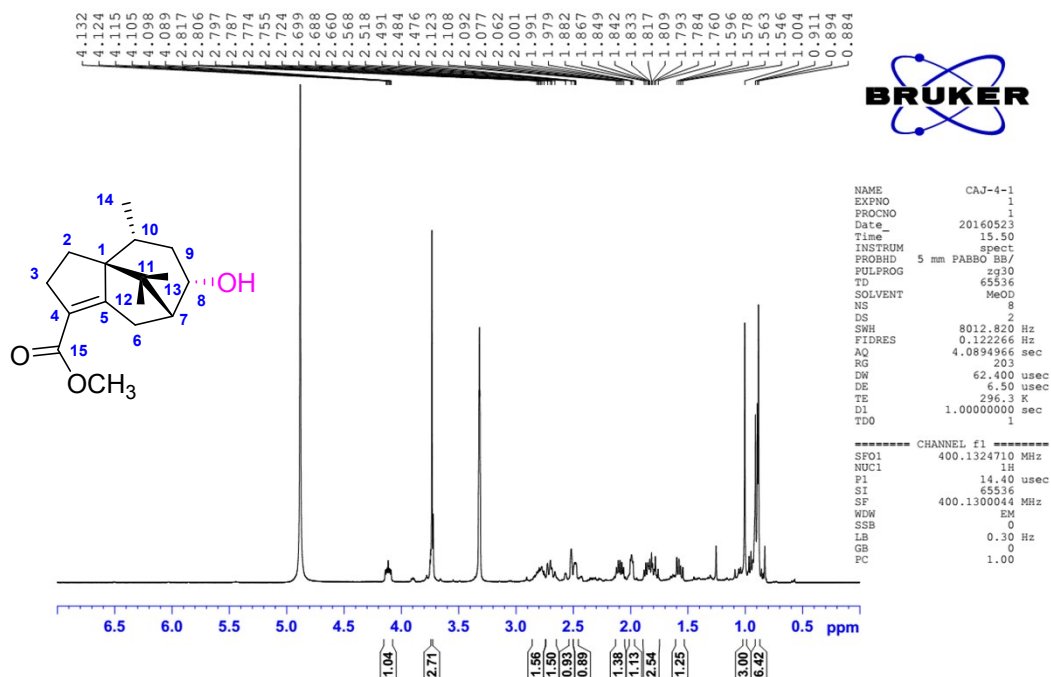

Figure S23. <sup>1</sup>H NMR spectrum (400 MHz, CD<sub>3</sub>OD-*d*<sub>4</sub>) of compound 4

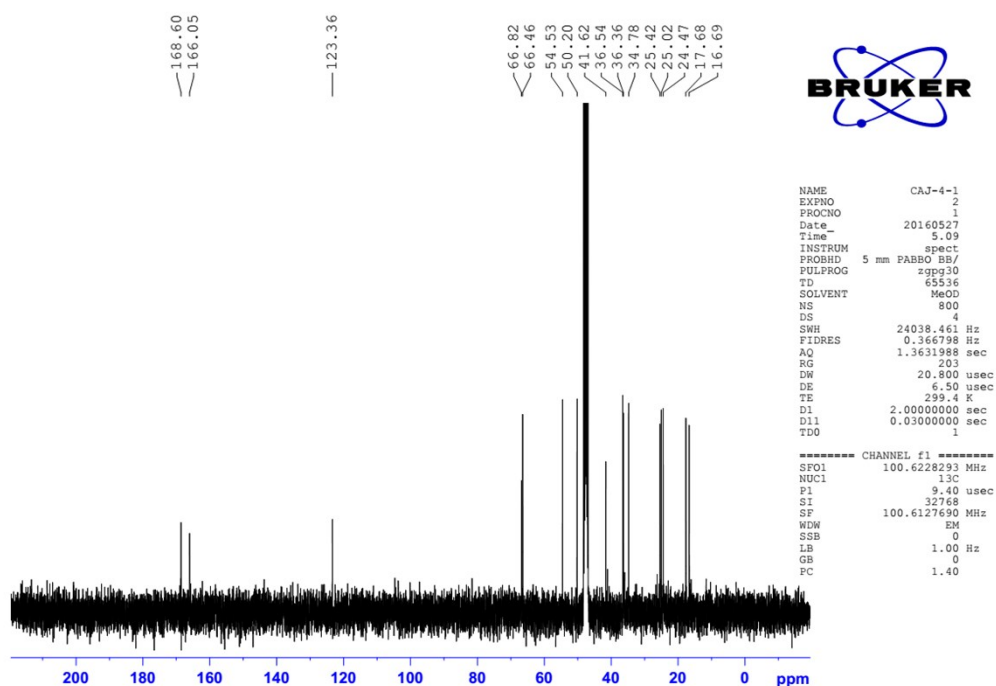

Figure S24.  $^{13}\text{C}$  NMR spectrum (100 MHz,  $\text{CD}_3\text{OD}-d_4$ ) of compound 4

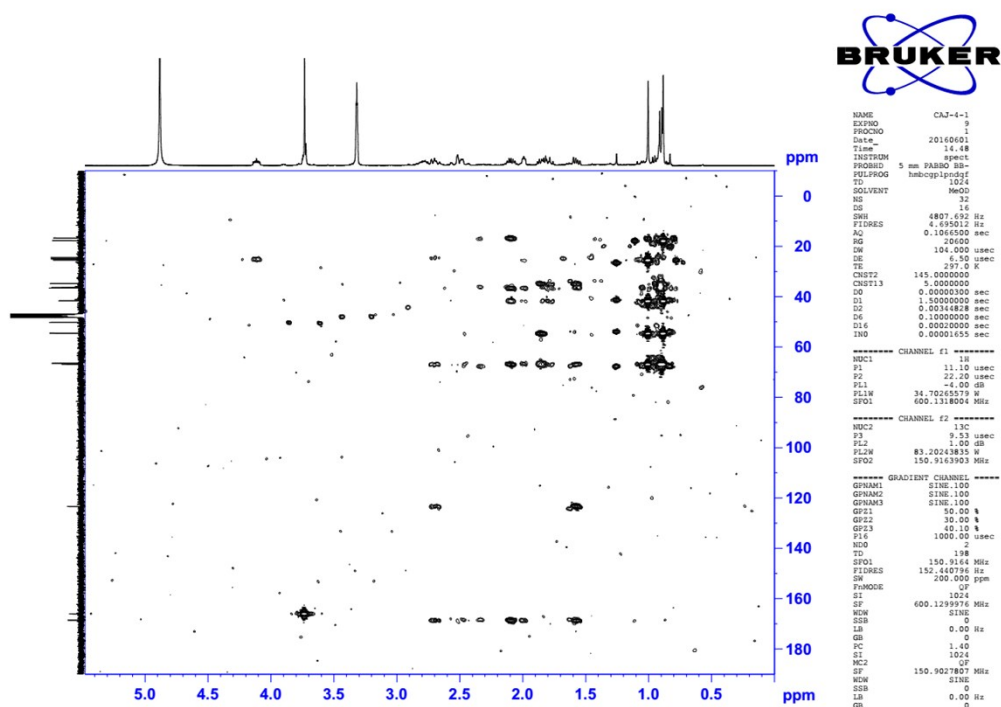

Figure S25. HMBC spectrum (600 MHz,  $\text{CD}_3\text{OD}-d_4$ ) of compound 4

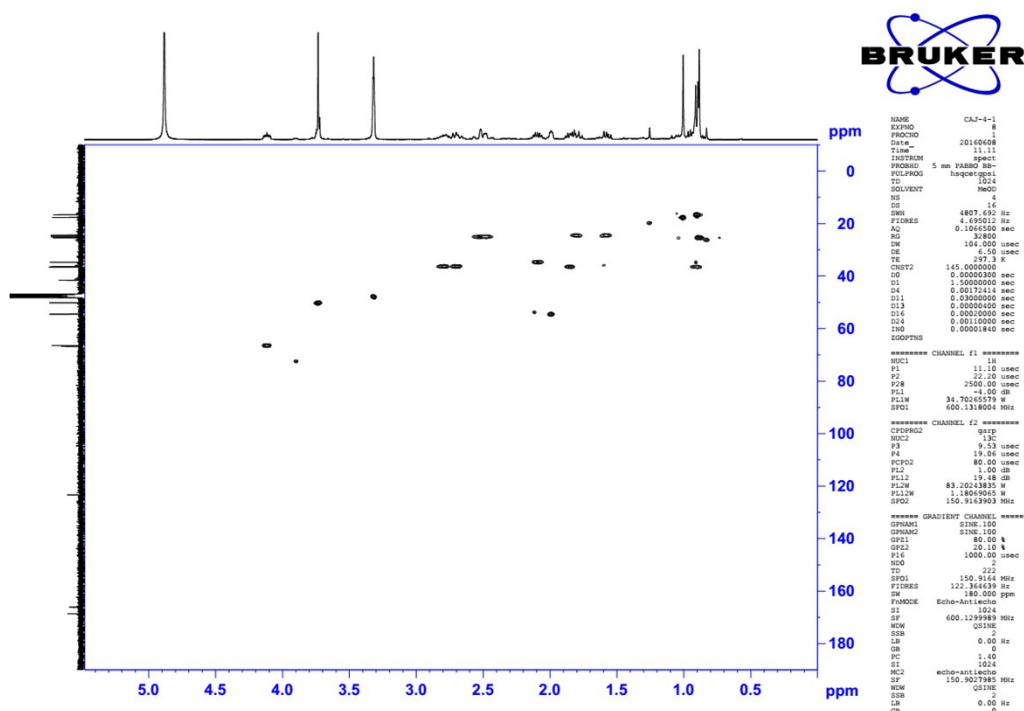

Figure S26. HSQC spectrum (600 MHz, CD<sub>3</sub>OD-*d*<sub>4</sub>) of compound 4

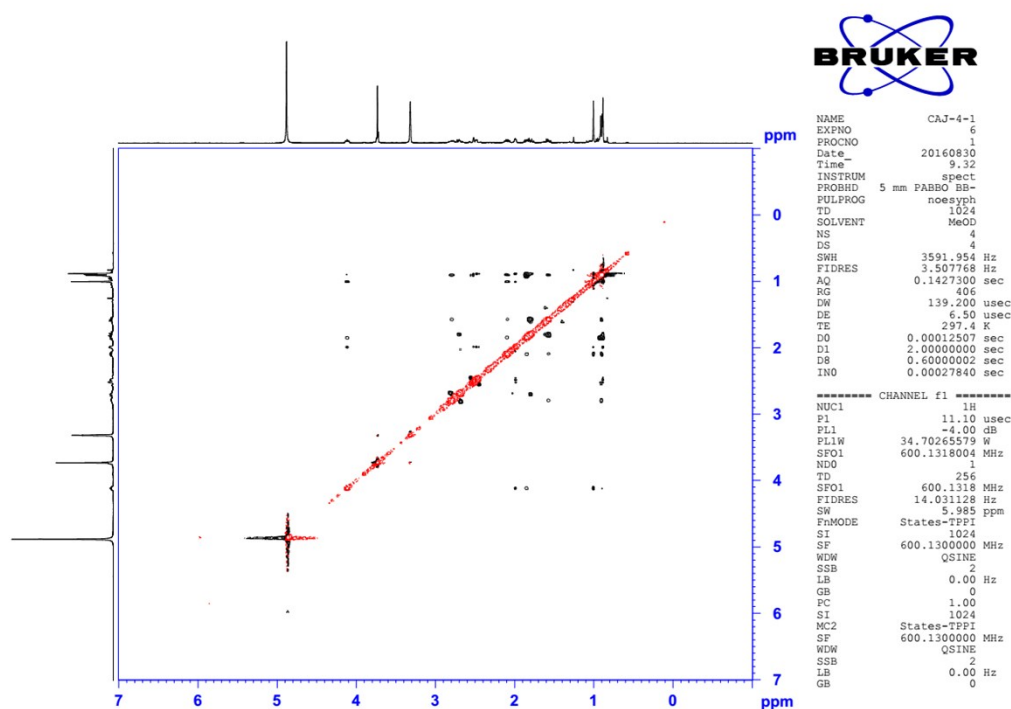

Figure S27. NOESY spectrum (600 MHz, CD<sub>3</sub>OD-*d*<sub>4</sub>) of compound 4

## Mass Spectrum Molecular Formula Report

### Analysis Info

|                                                             |                                        |
|-------------------------------------------------------------|----------------------------------------|
| Analysis Name: D:\Data\20160617CEYANG\CAJ-4_1-F,2_01_7439.d | Acquisition Date: 6/17/2016 6:03:00 PM |
| Method: 20131026_ceyang.m                                   | Operator: Bruker Customer              |
| Sample Name: CAJ-4                                          | Instrument / Ser#: micrOTOF-Q 125      |
| Comment:                                                    |                                        |

### Acquisition Parameter

|                    |                                  |                          |                        |
|--------------------|----------------------------------|--------------------------|------------------------|
| Source Type: ESI   | Ion Polarity: Positive           | Set Nebulizer: 1.2 Bar   | Set Dry Gas: 180 °C    |
| Focus: Active      | Set Capillary: 4500 V            | Set Dry Heater: 180 °C   | Set Dry Gas: 8.0 l/min |
| Scan Begin: 50 m/z | Set End Plate Offset: -500 V     | Set Divert Valve: Source |                        |
| Scan End: 3000 m/z | Set Collision Cell RF: 400.0 Vpp |                          |                        |

### Generate Molecular Formula Parameter

|                           |                              |            |  |
|---------------------------|------------------------------|------------|--|
| Formula, min.: C16H24O3Na |                              |            |  |
| Formula, max.:            |                              |            |  |
| Measured m/z: 287.162     | Tolerance: 5 ppm             | Charge: 1  |  |
| Check Valence: no         | Minimum: 0                   | Maximum: 0 |  |
| Nitrogen Rule: no         | Electron Configuration: both |            |  |
| Filter H/C Ratio: no      | Minimum: 0                   | Maximum: 3 |  |
| Estimate Carbon: yes      |                              |            |  |

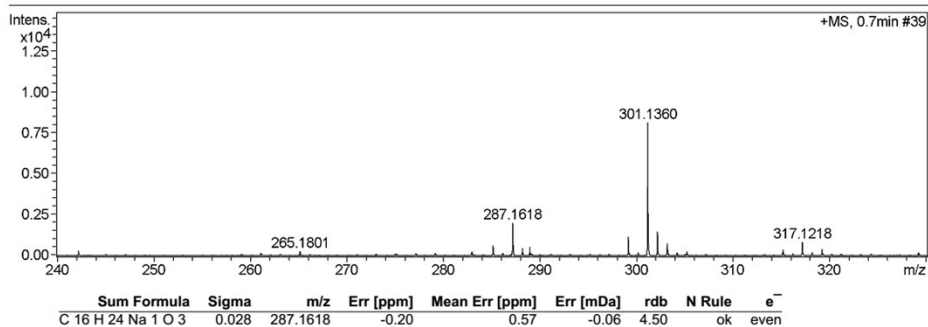

**Figure S28.** HRESIMS spectrum of compound **4**

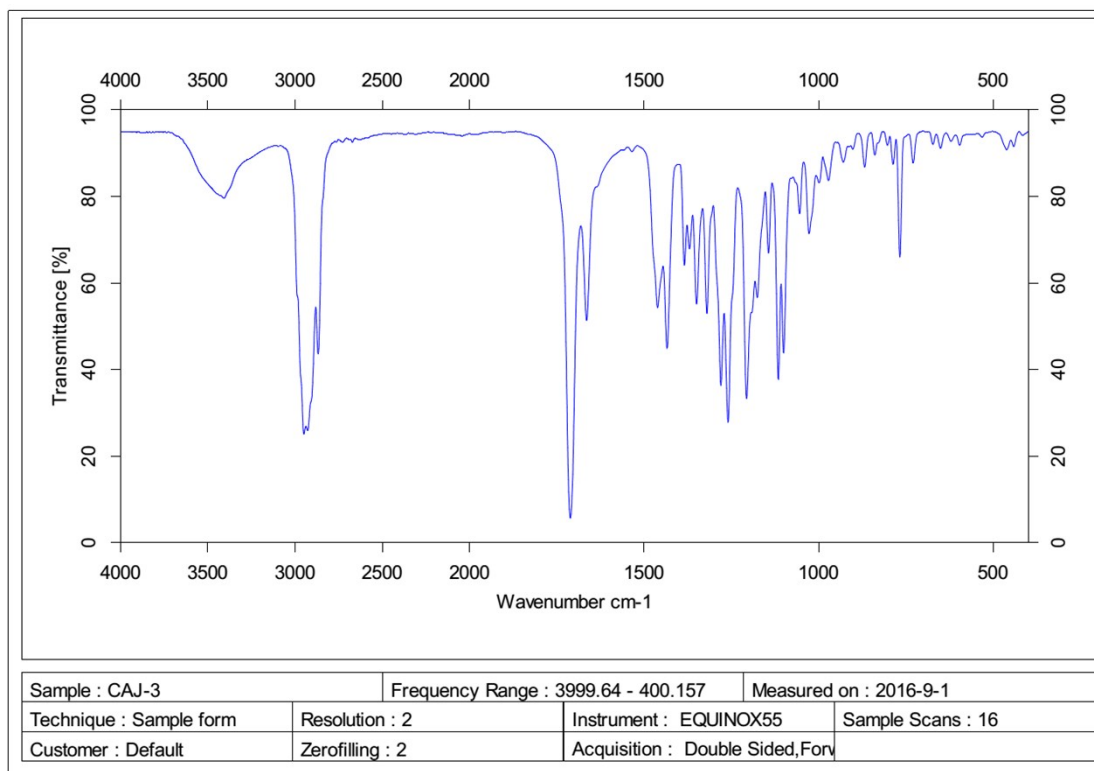

**Figure S29.** IR spectrum of compound **4**

# Spectrum Peak Pick Report

FIELD FIELD TEXT

Data Set: 没有

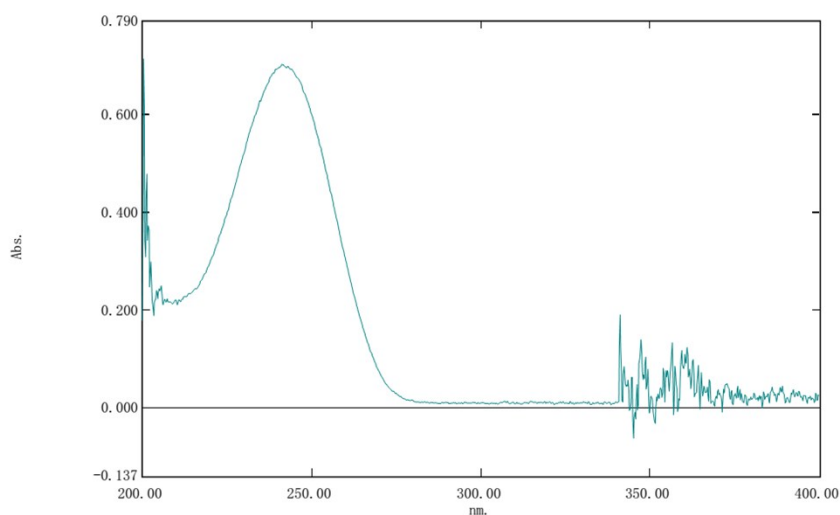

Figure S30. UV spectrum of compound 4

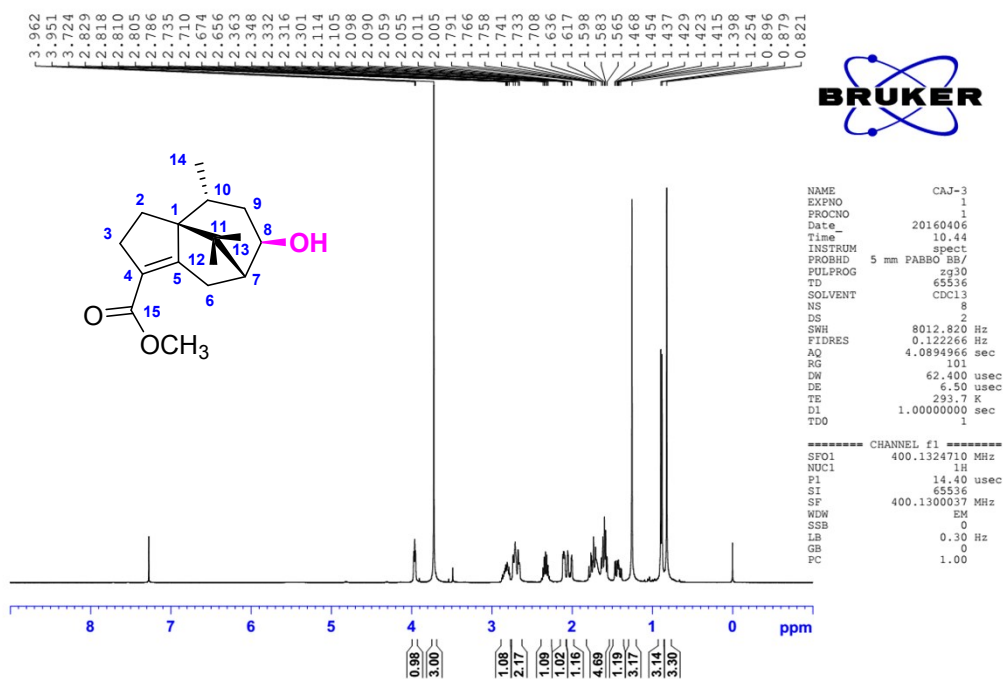

Figure S31. <sup>1</sup>H NMR spectrum (400 MHz, CDCl<sub>3</sub>-d) of compound 5

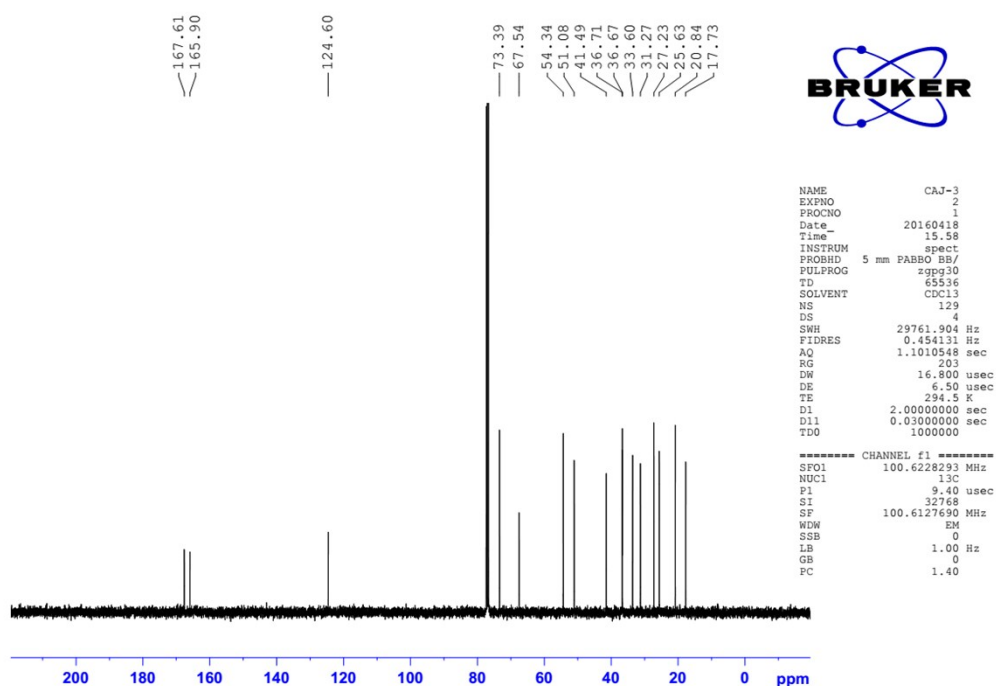

Figure S32.  $^{13}\text{C}$  NMR spectrum (100 MHz,  $\text{CDCl}_3\text{-}d$ ) of compound **5**

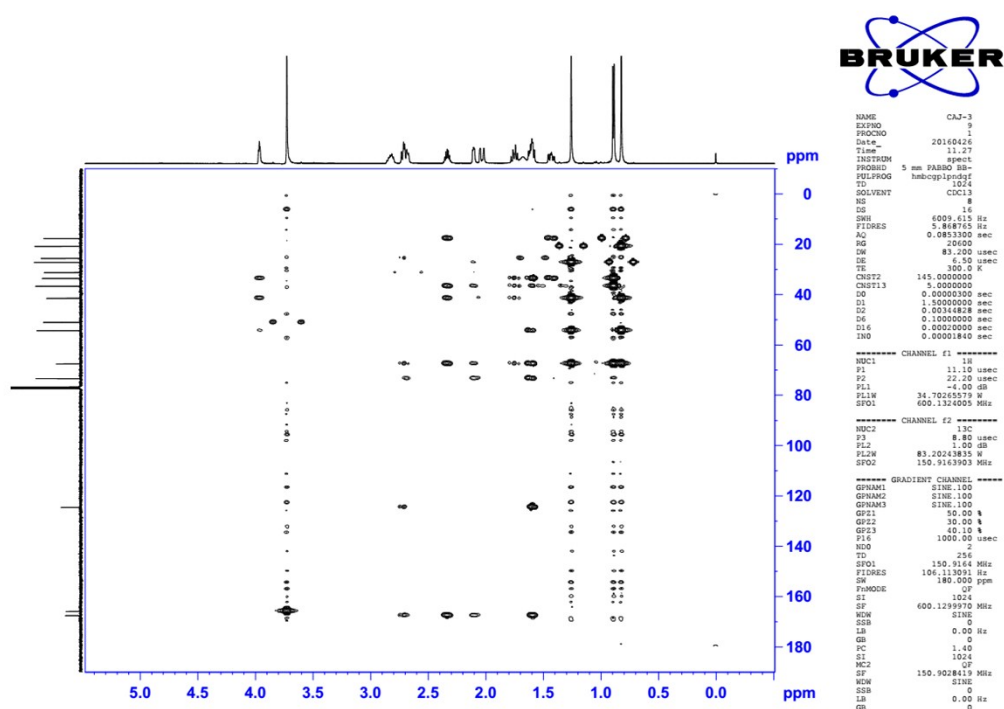

Figure S33. HMBC spectrum (600 MHz,  $\text{CDCl}_3\text{-}d$ ) of compound **5**

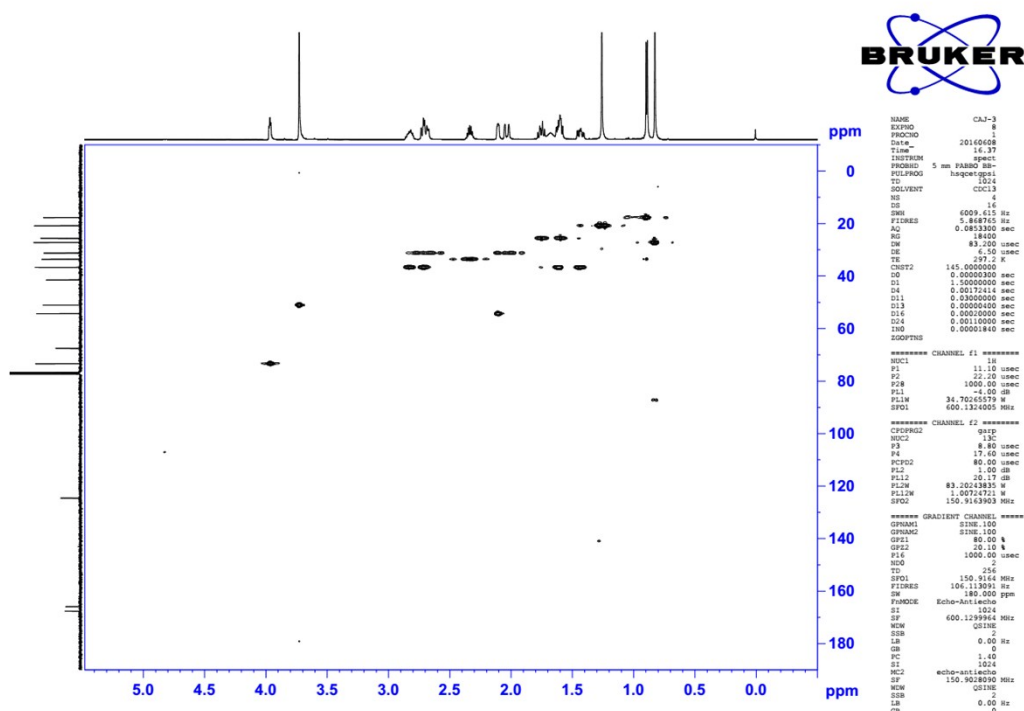

**Figure S34.** HSQC spectrum (600 MHz,  $\text{CDCl}_3$ -*d*) of compound **5**

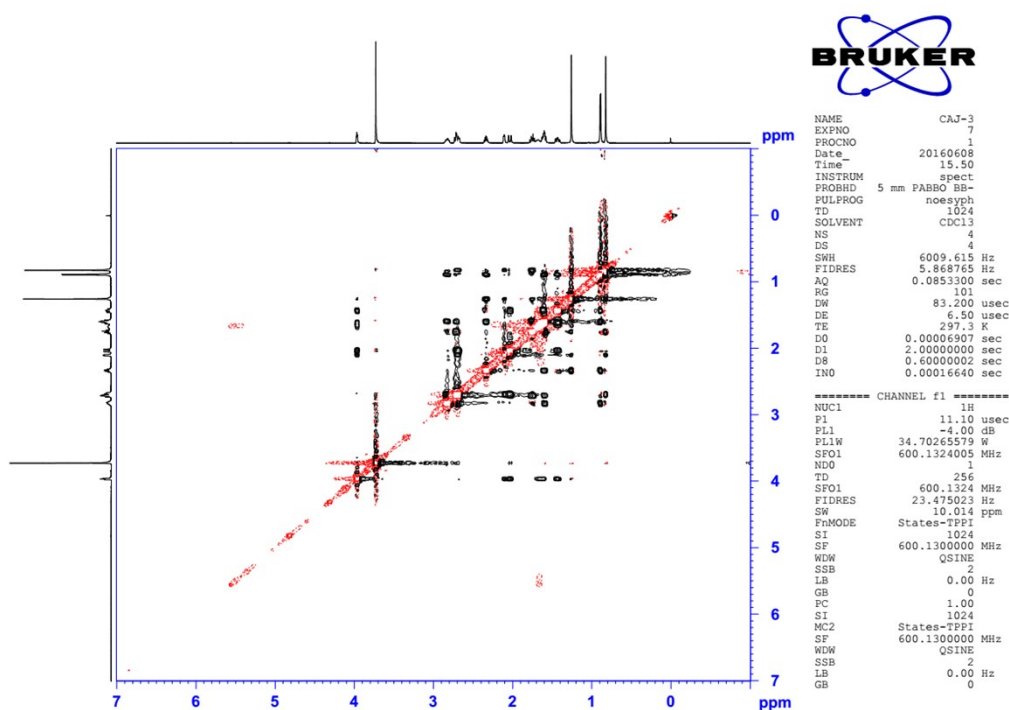

**Figure S35.** NOESY spectrum (600 MHz,  $\text{CDCl}_3$ -*d*) of compound **5**

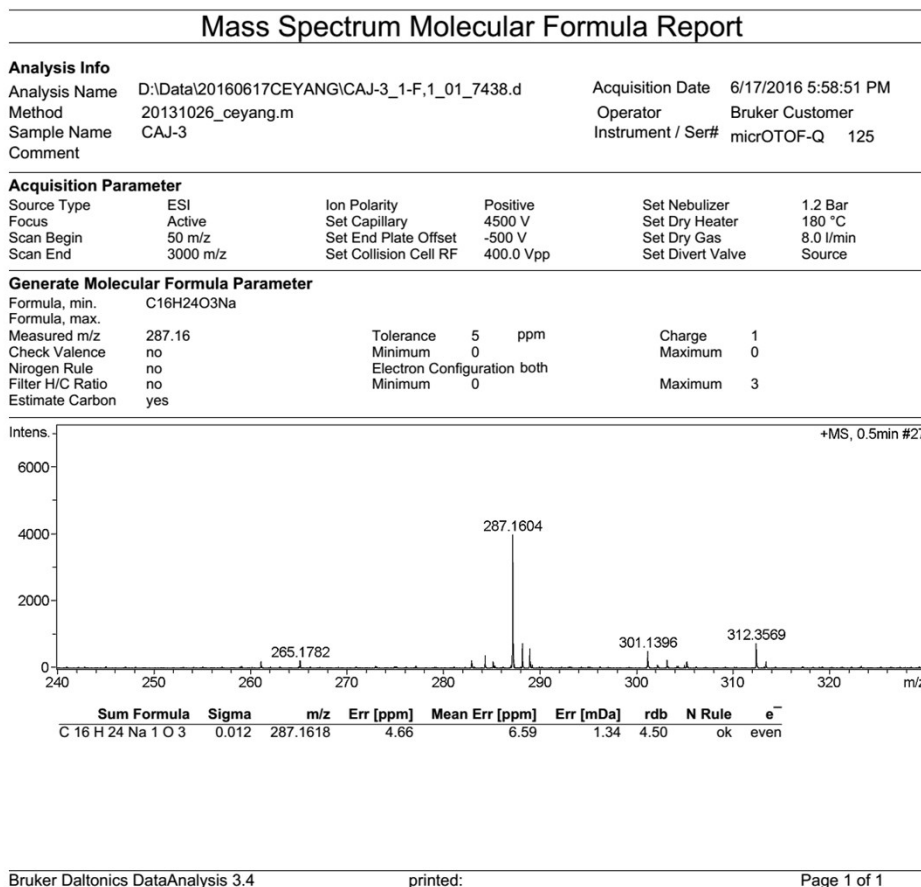

**Figure S36.** HRESIMS spectrum of compound **5**

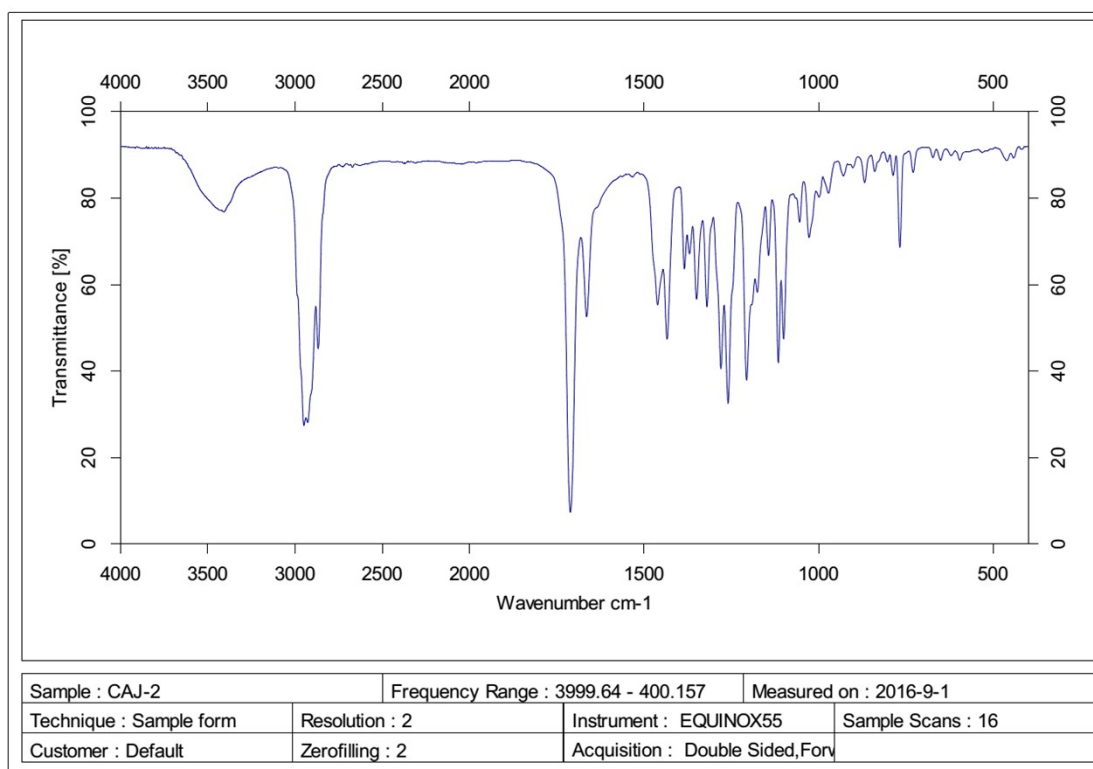

**Figure S37.** IR spectrum of compound **5**

# Spectrum Peak Pick Report

FIELD FIELD TEXT

Data Set: 没有

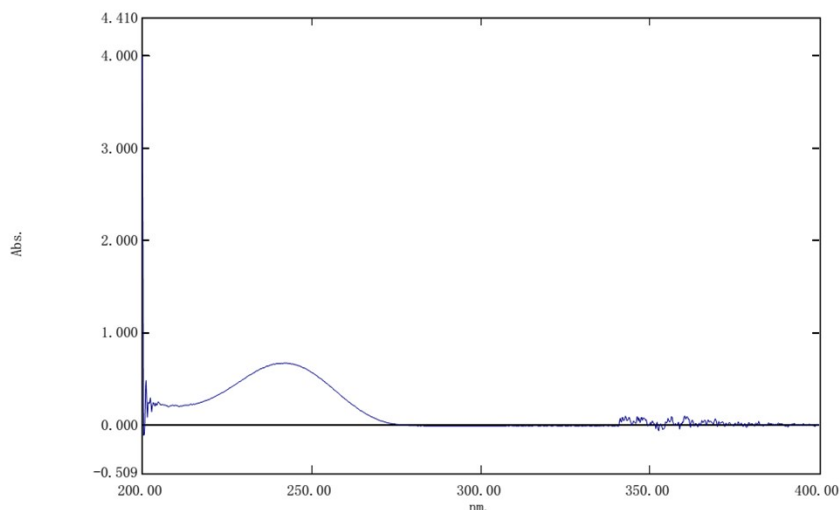

Figure S38. UV spectrum of compound 5

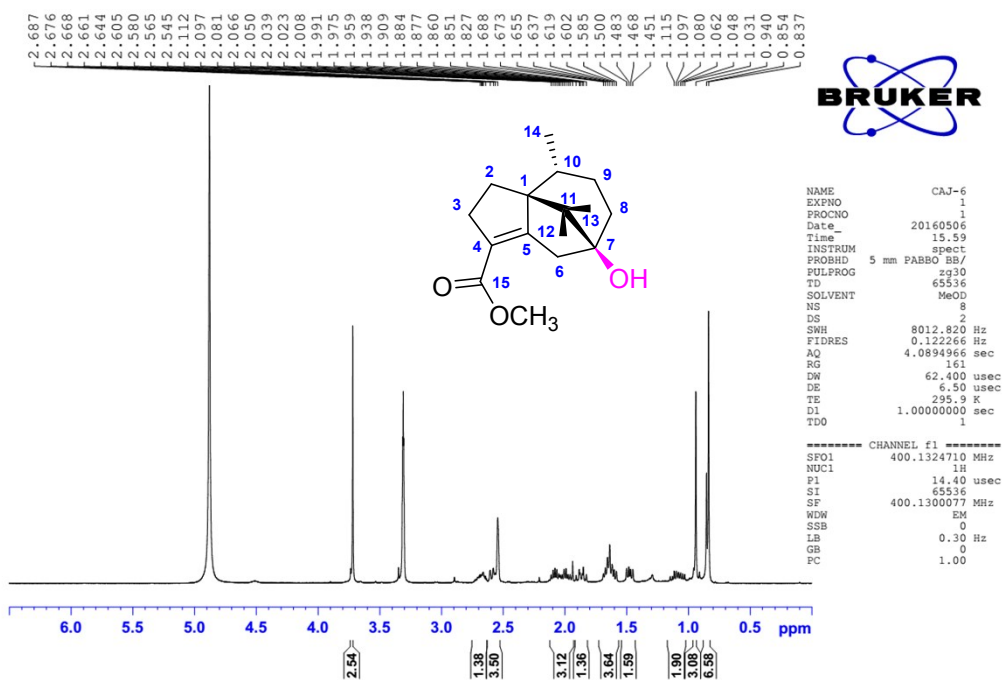

Figure S39. <sup>1</sup>H NMR spectrum (400 MHz, CD<sub>3</sub>OD-*d*<sub>4</sub>) of compound 6

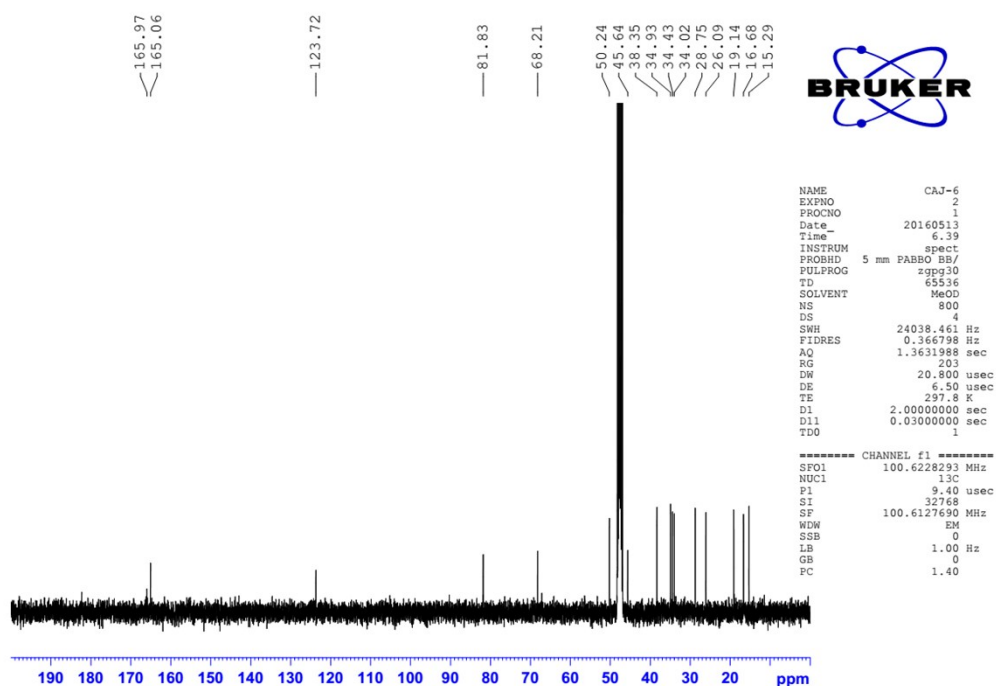

**Figure S40.**  $^{13}\text{C}$  NMR spectrum (100 MHz,  $\text{CD}_3\text{OD}-d_4$ ) of compound **6**

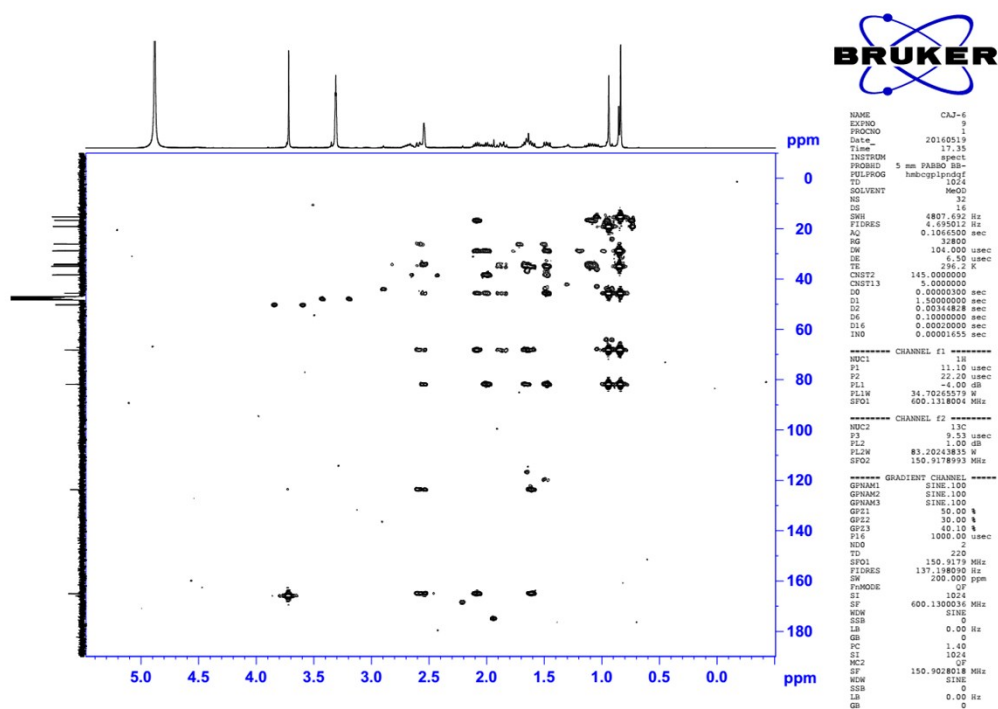

**Figure S41.** HMBC spectrum (600 MHz,  $\text{CD}_3\text{OD}-d_4$ ) of compound **6**

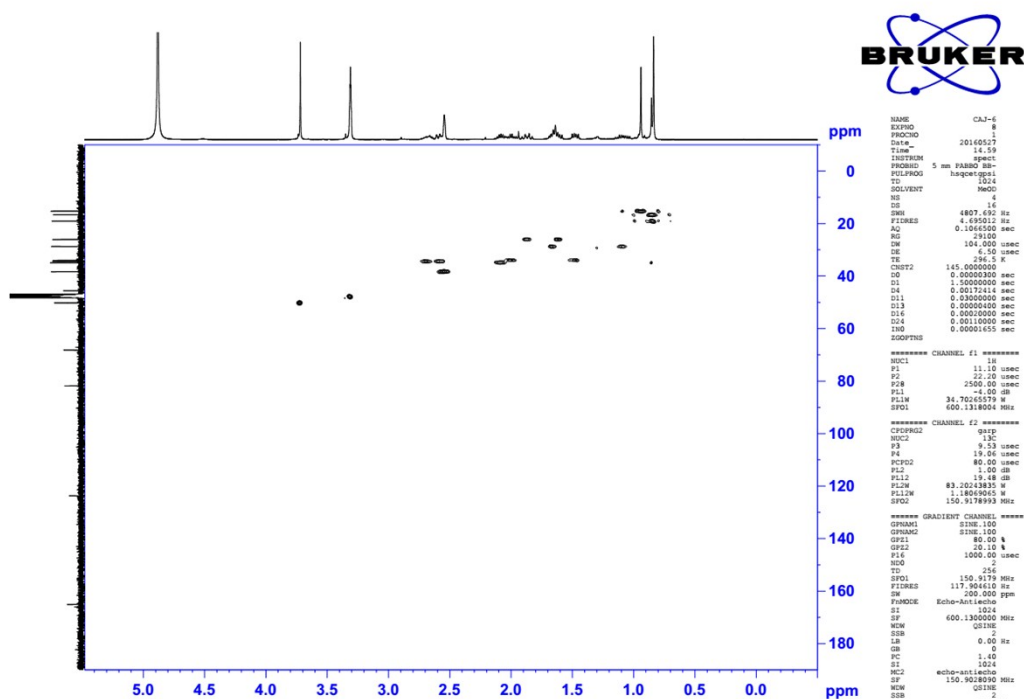

Figure S42. HSQC spectrum (600 MHz, CD<sub>3</sub>OD-*d*<sub>4</sub>) of compound 6

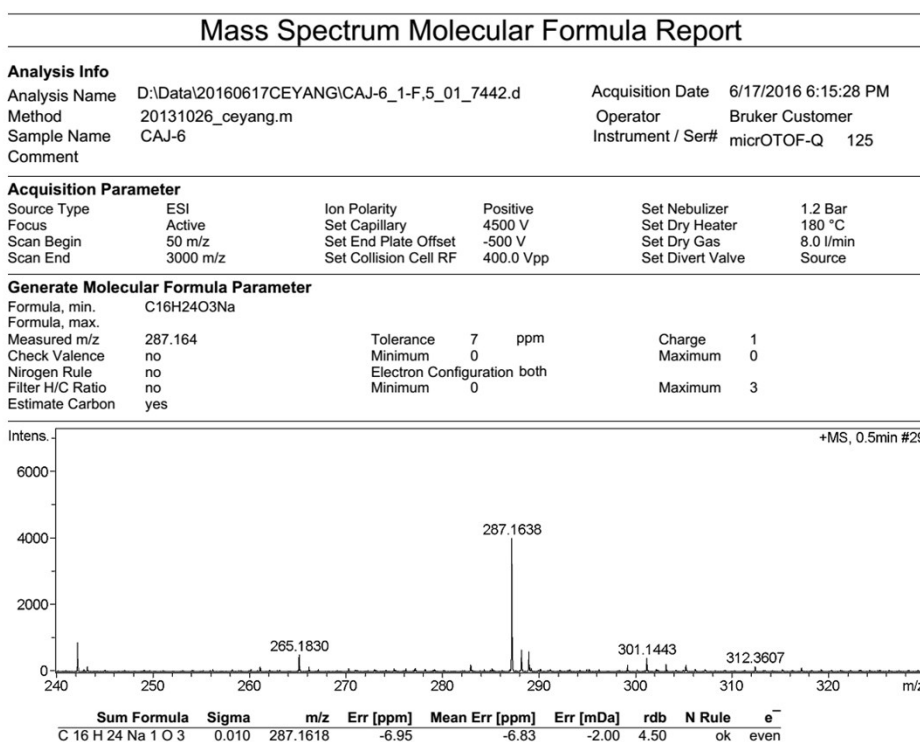

Figure S43. HRESIMS spectrum of compound 6

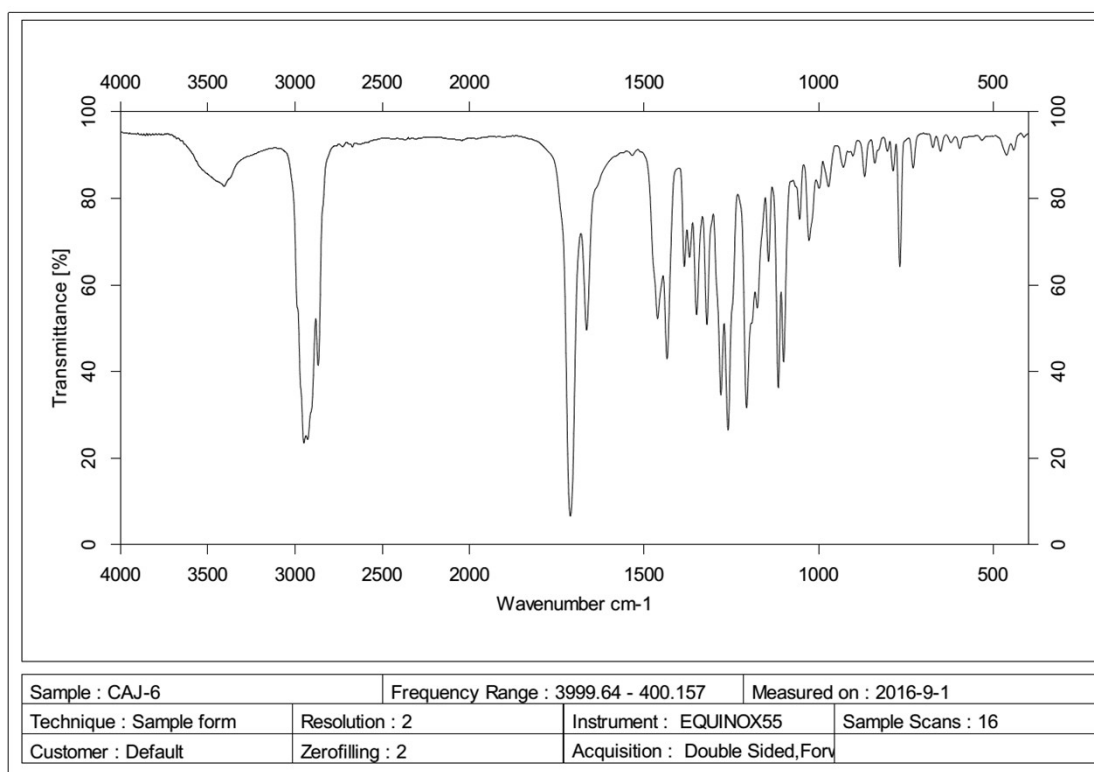

**Figure S44.** IR spectrum of compound **6**

## Spectrum Peak Pick Report

FIELD FIELD TEXT

Data Set: 没有

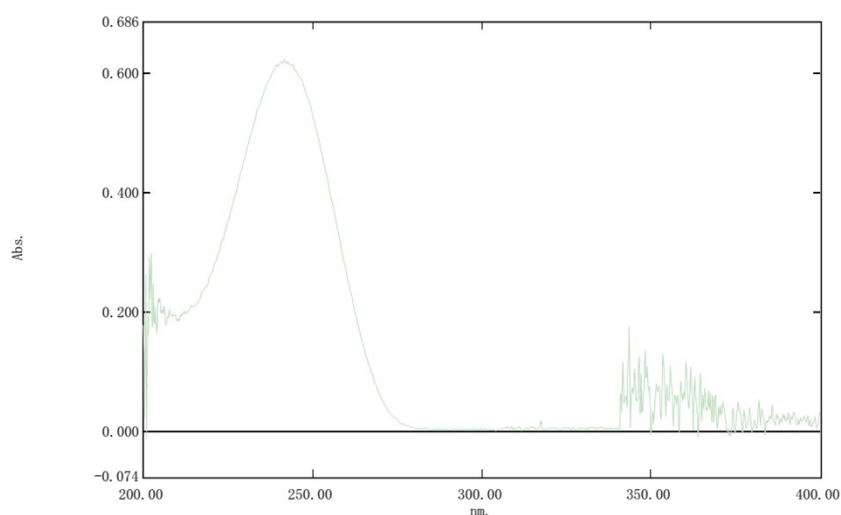

**Figure S45.** UV spectrum of compound **6**

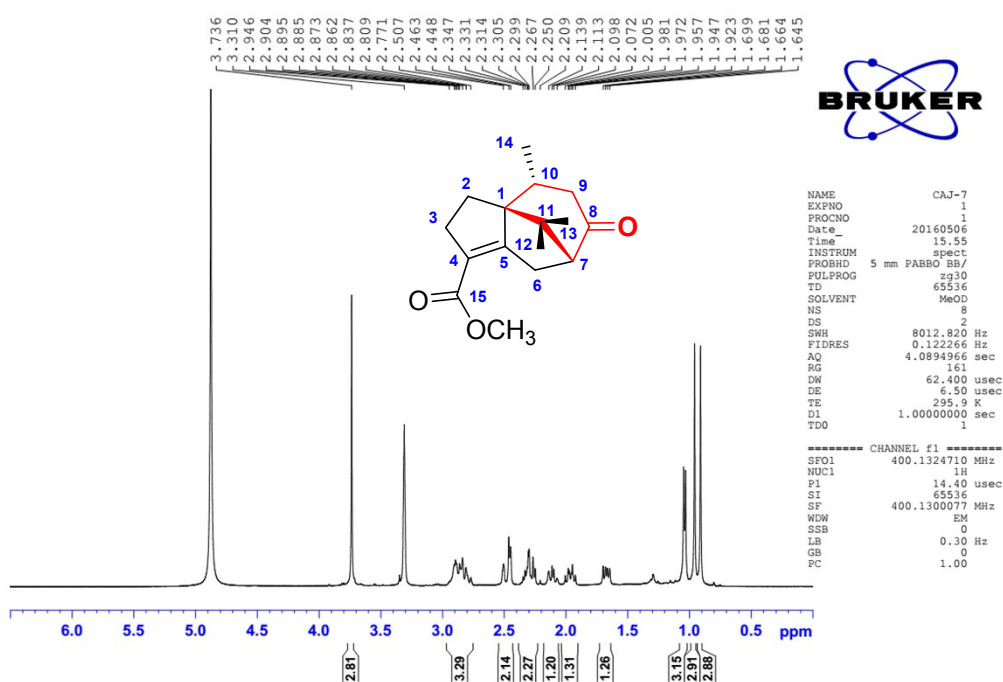

Figure S46.  $^1\text{H}$  NMR spectrum (400 MHz,  $\text{CD}_3\text{OD}-d_4$ ) of compound 7

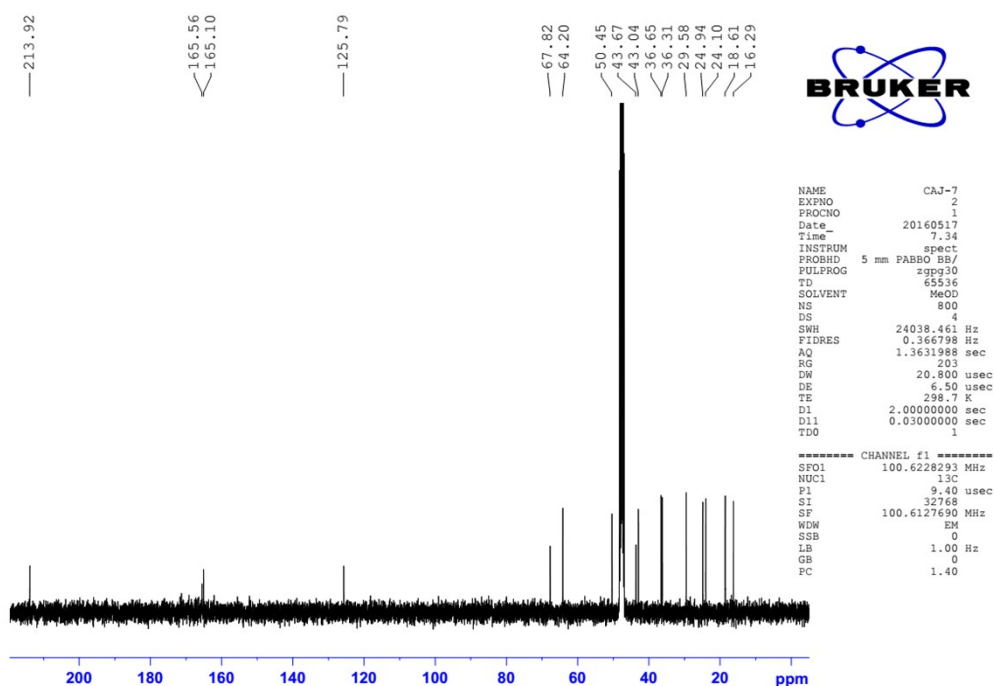

Figure S47.  $^{13}\text{C}$  NMR spectrum (100 MHz,  $\text{CD}_3\text{OD}-d_4$ ) of compound 7

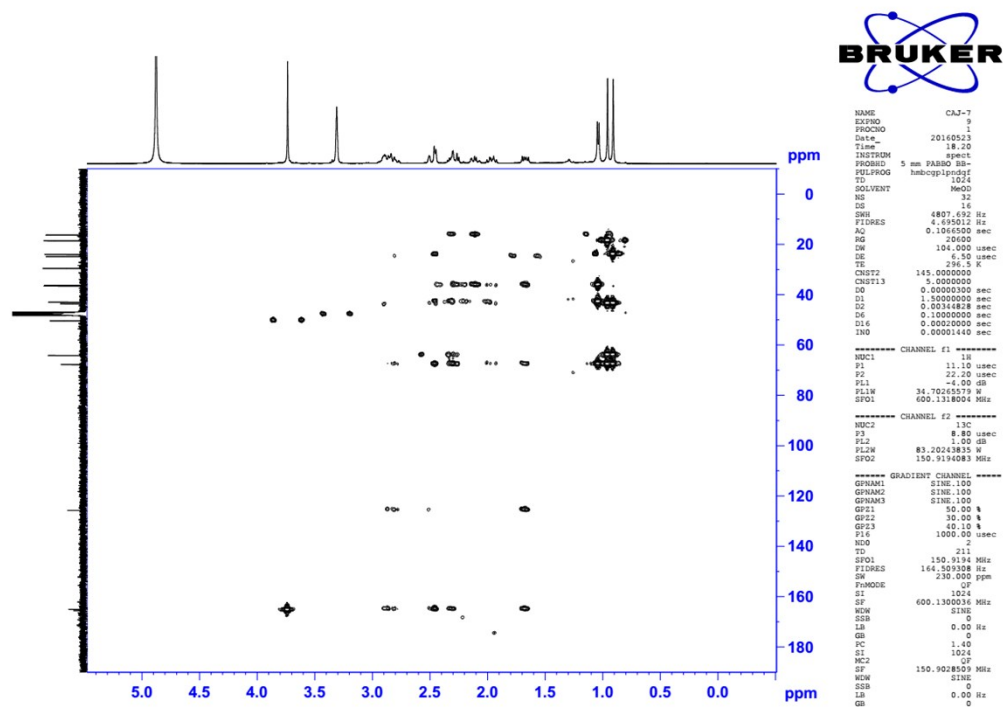

Figure S48. HMBC spectrum (600 MHz, CD<sub>3</sub>OD-*d*<sub>4</sub>) of compound 7

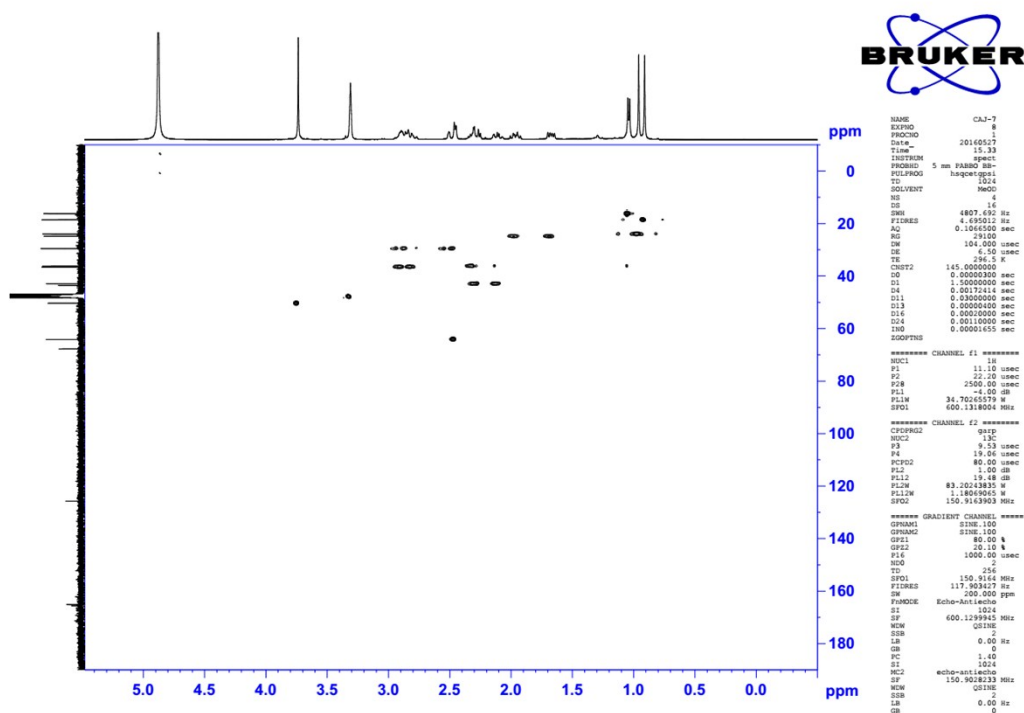

Figure S49. HSQC spectrum (600 MHz, CD<sub>3</sub>OD-*d*<sub>4</sub>) of compound 7

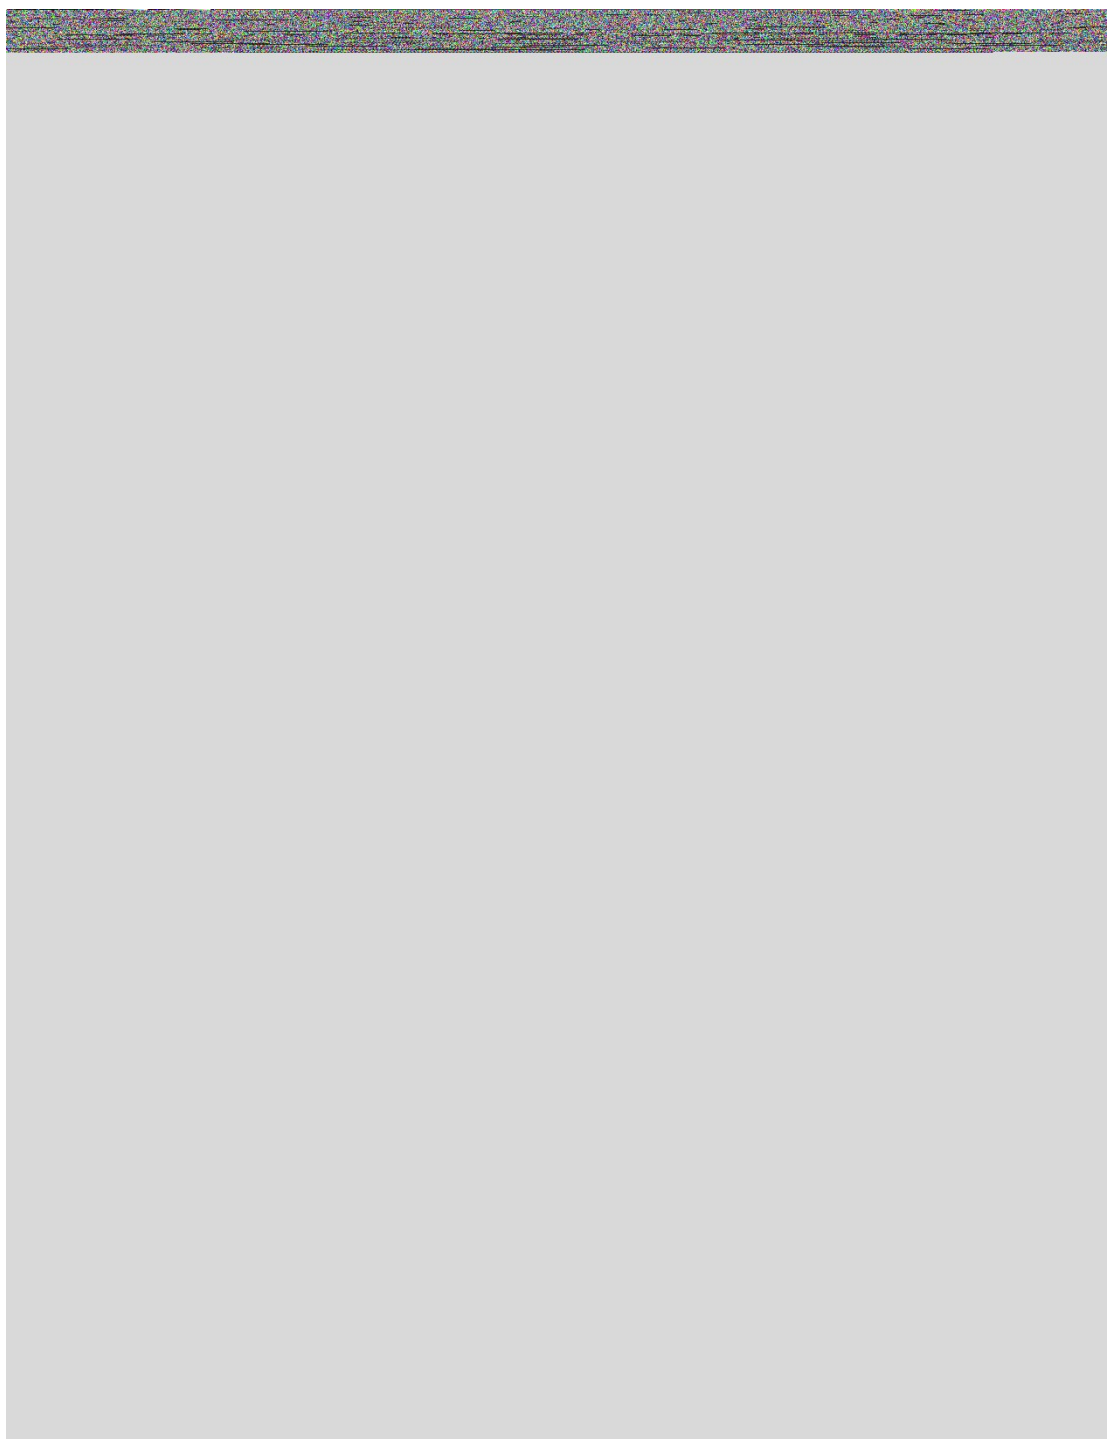

**Figure S50.** HRESIMS spectrum of compound **7**

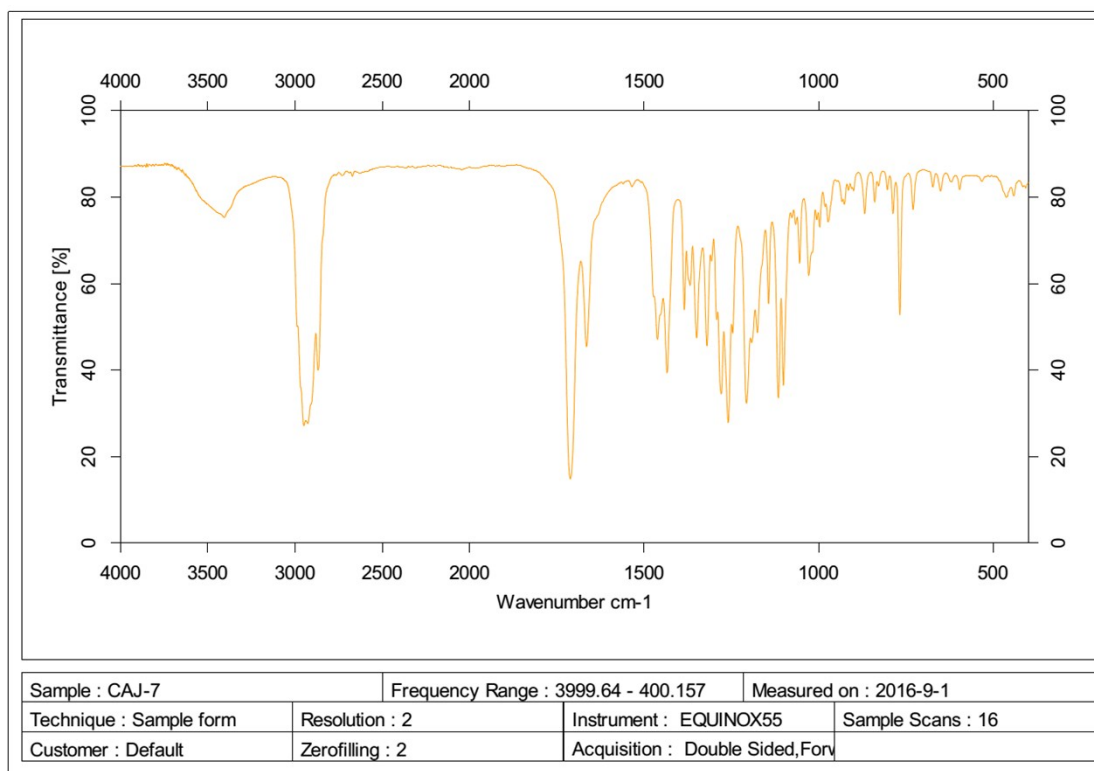

**Figure S51.** IR spectrum of compound **7**

## Spectrum Peak Pick Report

FIELD FIELD TEXT

Data Set: 没有

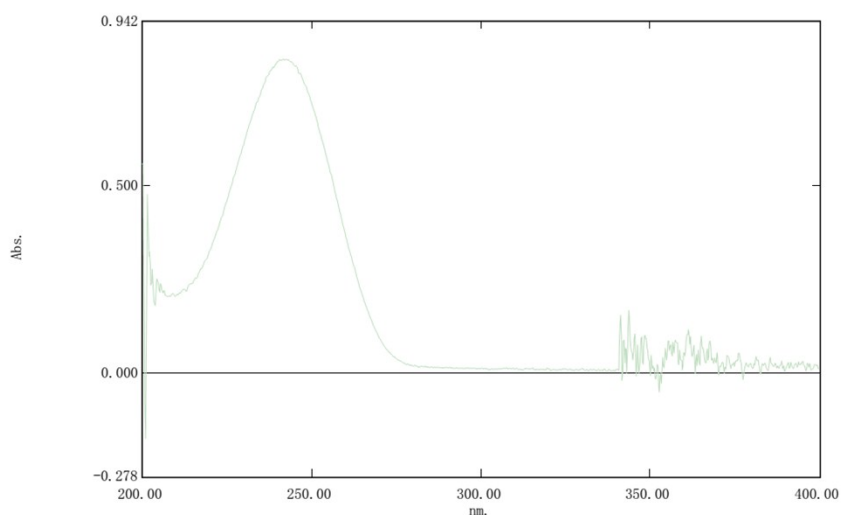

**Figure S52.** UV spectrum of compound **7**



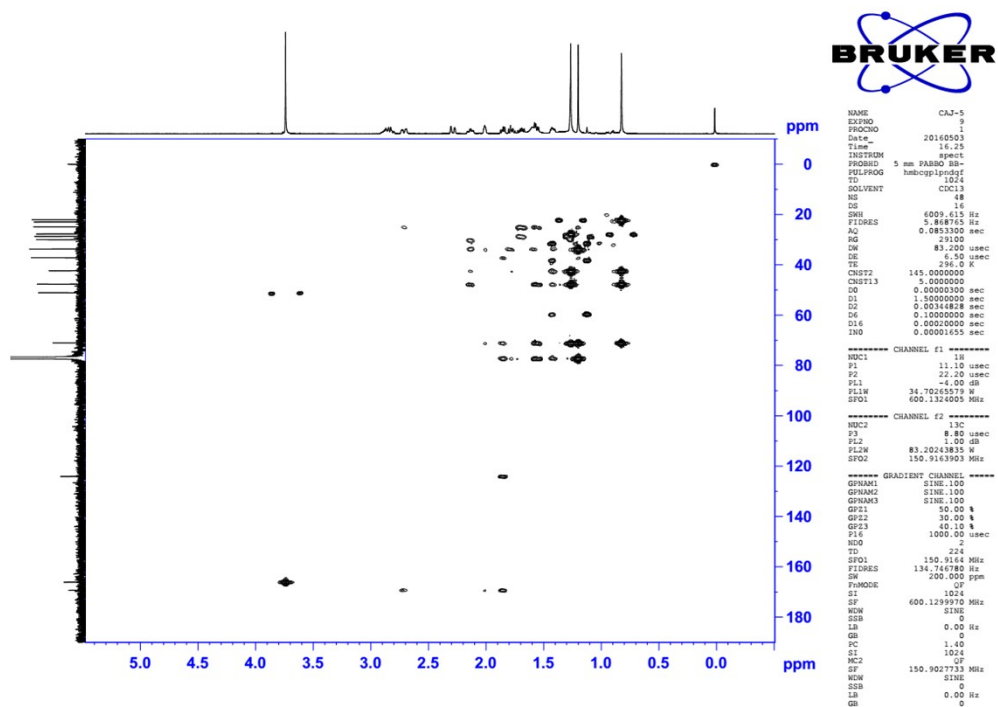

Figure S55. HMBC spectrum (600 MHz,  $\text{CDCl}_3$ -d) of compound 8

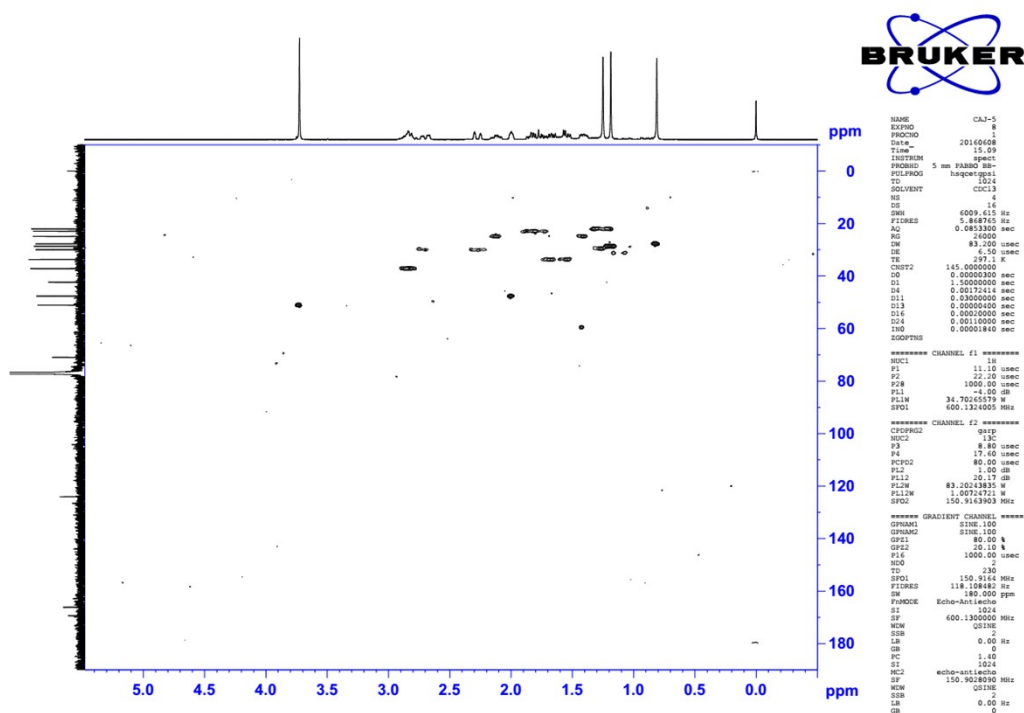

Figure S56. HSQC spectrum (600 MHz,  $\text{CDCl}_3$ -d) of compound 8

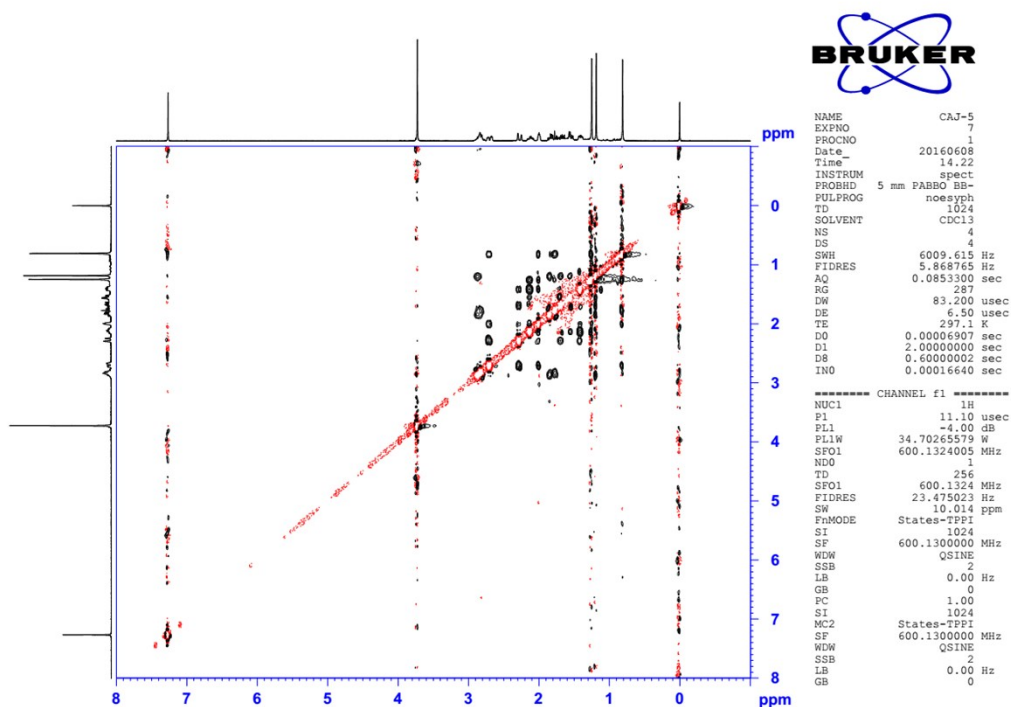

**Figure S57.** NOESY spectrum (600 MHz,  $\text{CDCl}_3\text{-}d$ ) of compound **8**

### Mass Spectrum Molecular Formula Report

#### Analysis Info

Analysis Name D:\Data\20160617CEYANG\CAJ-5\_1-F,4\_01\_7441.d  
Method 20131026\_ceyang.m  
Sample Name CAJ-5  
Comment

Acquisition Date 6/17/2016 6:11:18 PM  
Operator Bruker Customer  
Instrument / Ser# micrOTOF-Q 125

#### Acquisition Parameter

|             |          |                       |           |                  |           |
|-------------|----------|-----------------------|-----------|------------------|-----------|
| Source Type | ESI      | Ion Polarity          | Positive  | Set Nebulizer    | 1.2 Bar   |
| Focus       | Active   | Set Capillary         | 4500 V    | Set Dry Heater   | 180 °C    |
| Scan Begin  | 50 m/z   | Set End Plate Offset  | -500 V    | Set Dry Gas      | 8.0 l/min |
| Scan End    | 3000 m/z | Set Collision Cell RF | 400.0 Vpp | Set Divert Valve | Source    |

#### Generate Molecular Formula Parameter

Formula, min.  $\text{C}_{16}\text{H}_{24}\text{O}_3\text{Na}$

Formula, max.

Measured m/z 287.16

Check Valence no

Nitrogen Rule no

Filter H/C Ratio no

Estimate Carbon yes

Tolerance 7 ppm  
Minimum 0  
Electron Configuration both  
Minimum 0

Charge 1  
Maximum 0  
Maximum 3

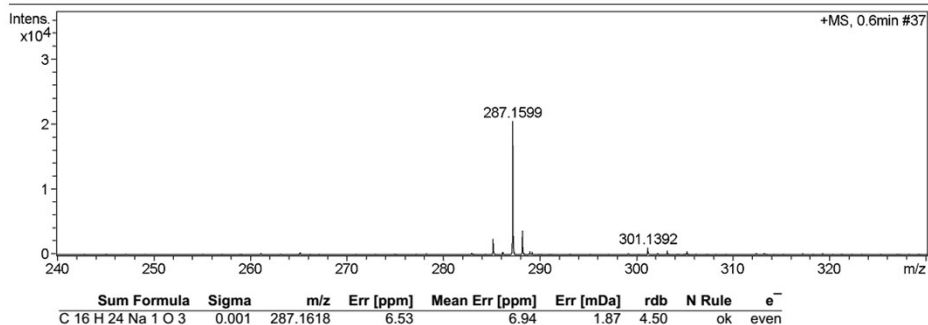

**Figure S58.** HRESIMS spectrum of compound **8**

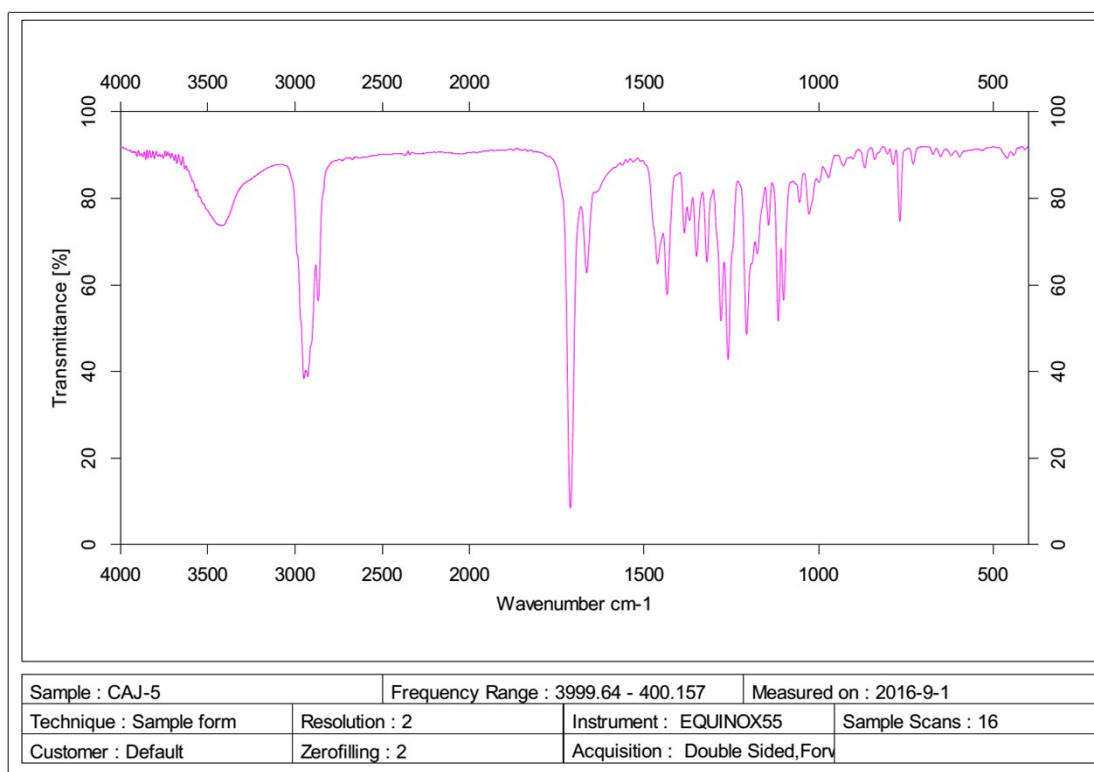

**Figure S59.** IR spectrum of compound **8**

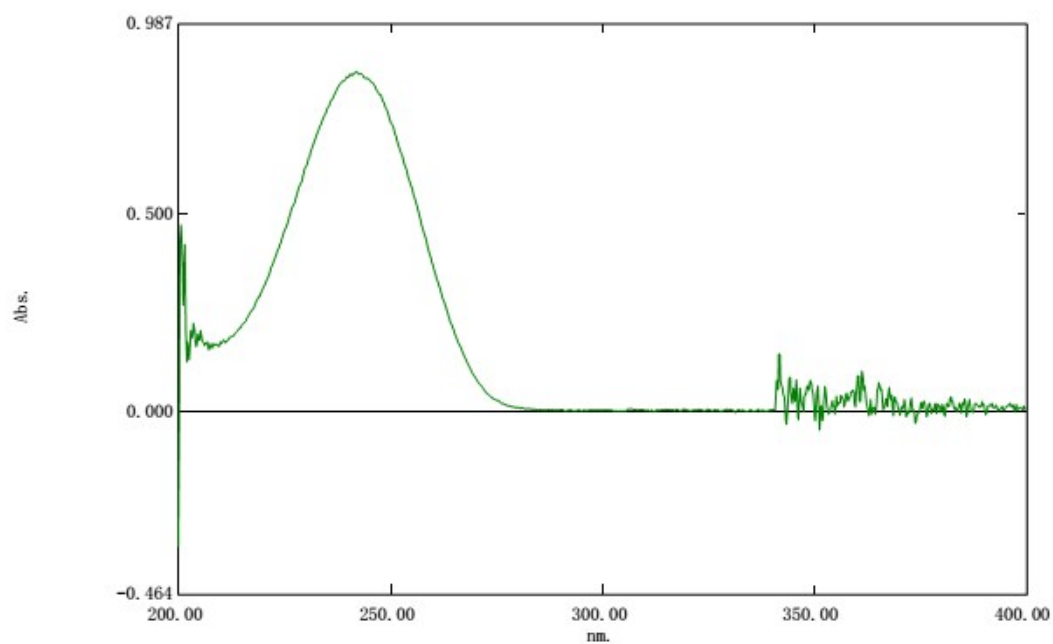

**Figure S60.** UV spectrum of compound **8**

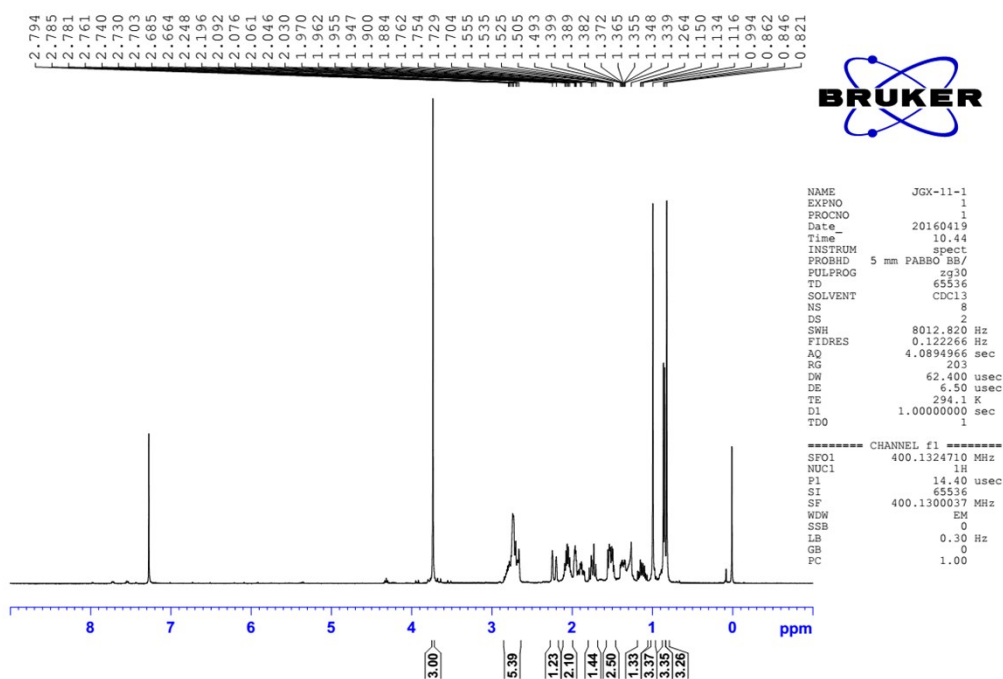

**Figure S61.**  $^1\text{H}$  NMR spectrum (400 MHz,  $\text{CDCl}_3\text{-}d$ ) of MC

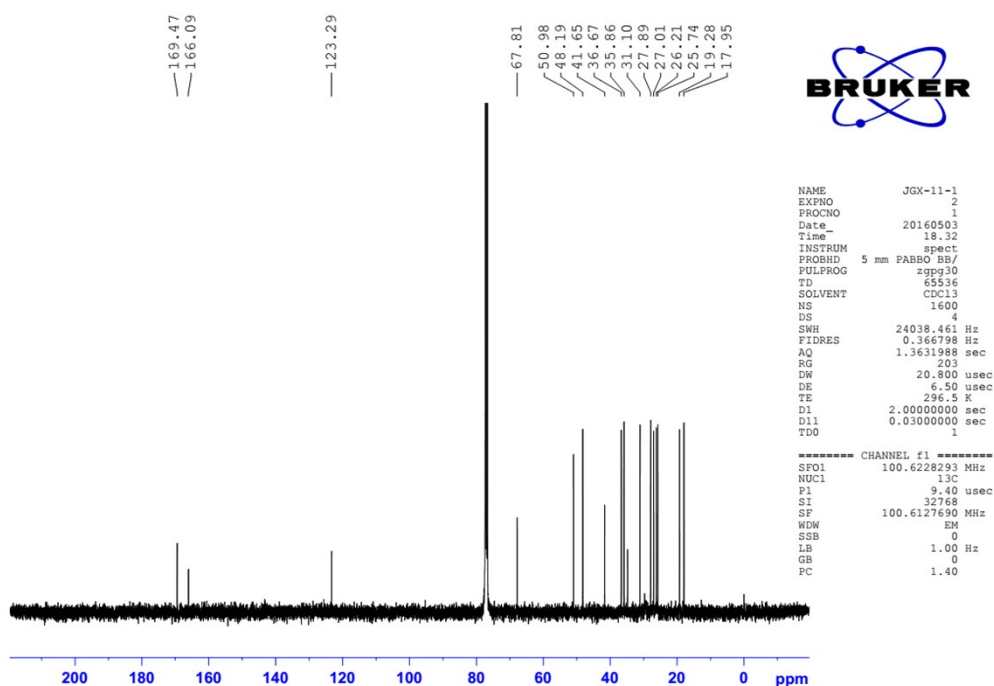

**Figure S62.**  $^{13}\text{C}$  NMR spectrum (100 MHz,  $\text{CDCl}_3\text{-}d$ ) of MC

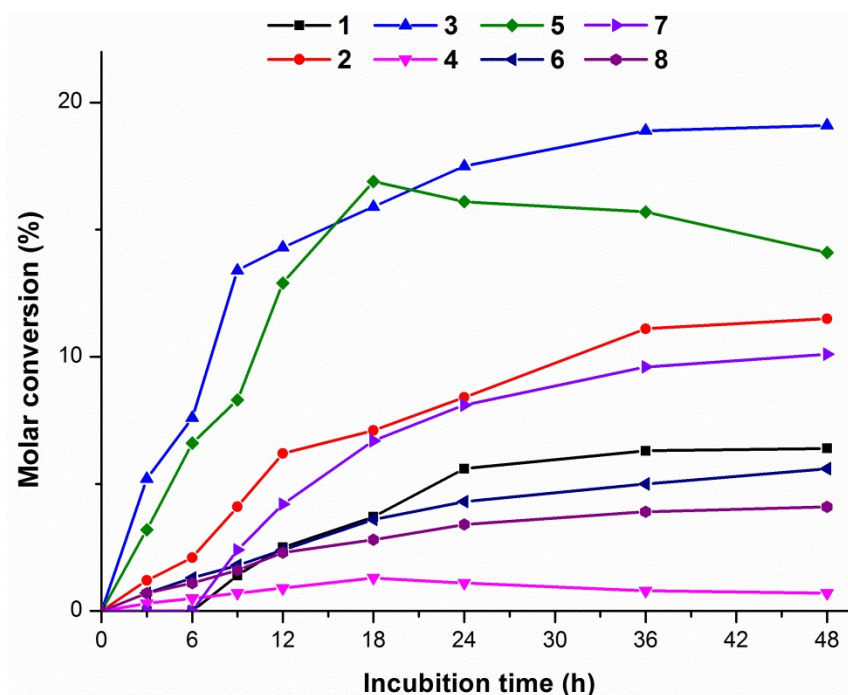

**Figure S63.** Enlarge figure of time courses of biotransformation.

The possible action mechanism of the active compounds was explored by using molecular docking studies. Through the virtual screening of a large number of anti-thrombotic targets, we found that compound **1** had better ligand-receptor interaction with eNOS.

Endothelial nitric oxide synthase (eNOS) generates NO, which plays a crucial role in maintaining vascular function and exerting an antithrombotic action [1]. Nitric oxide (NO) is a chief signaling molecule in cardiovascular regulation. In addition to relaxing vascular tone, NO regulates cardiac contractility, platelet aggregation, angiogenesis, and vascular smooth muscle proliferation. Thus, understanding the mechanisms of eNOS activation and regulation has been the focus of cardiovascular NO research [2-4]. And the literature indicates that eNOS and PT, TT, APTT are related [5].

The crystal structure of endothelial nitric oxide synthase (eNOS) was obtained from RCSB Protein Data Bank with PDB Code: 4D1P. The protein was also optimized using the Discovery Studio 3.0 program (Accelrys Inc., San Diego, USA) to remove water molecules and add all hydrogen atoms, and the structures were saved in PDB format for further docking studies. The Molegro Virtual Docker 4.0 (Molegro ApS, Aarhus, Denmark) program was carried out for the docking calculations.

In order to clarify the mode of action of the compounds **1-3** on eNOS, the molecular docking studies were carried out to measure the relative binding energies and localize binding sites. As shown in **Table S2**, compounds **1-3** (Moldock Score: -103.066, -105.809 -102.958 and -103.483) had similar bond in eNOS with the Ligand (Moldock Score: -103.483). Moreover, the hydrogen bonds with amino acids residues could also be observed in **Figure S64**. Compounds **1-3** showed the same hydrogen bonds with ligand at residues. Based on the above conclusions, we can speculate that the compound **1** may be an activator of eNOS.

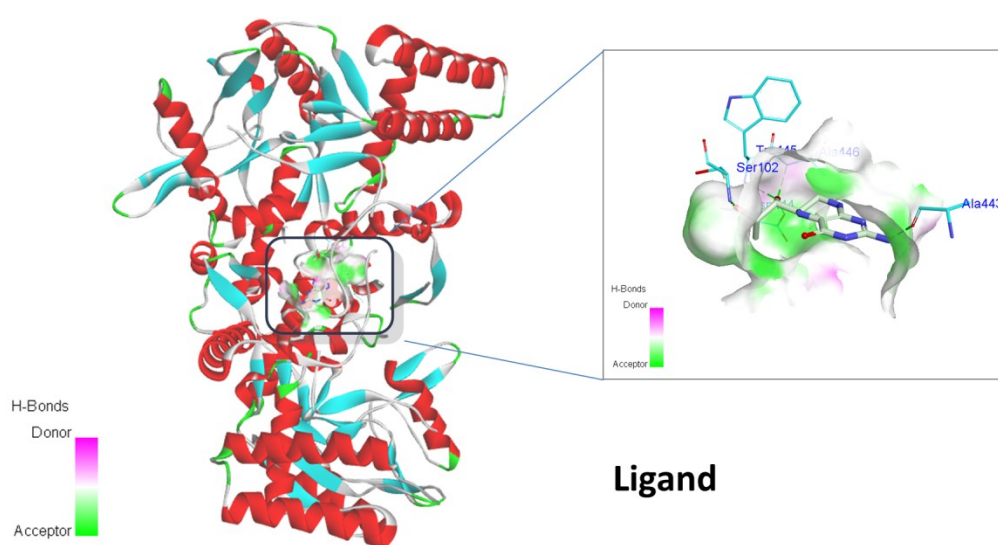

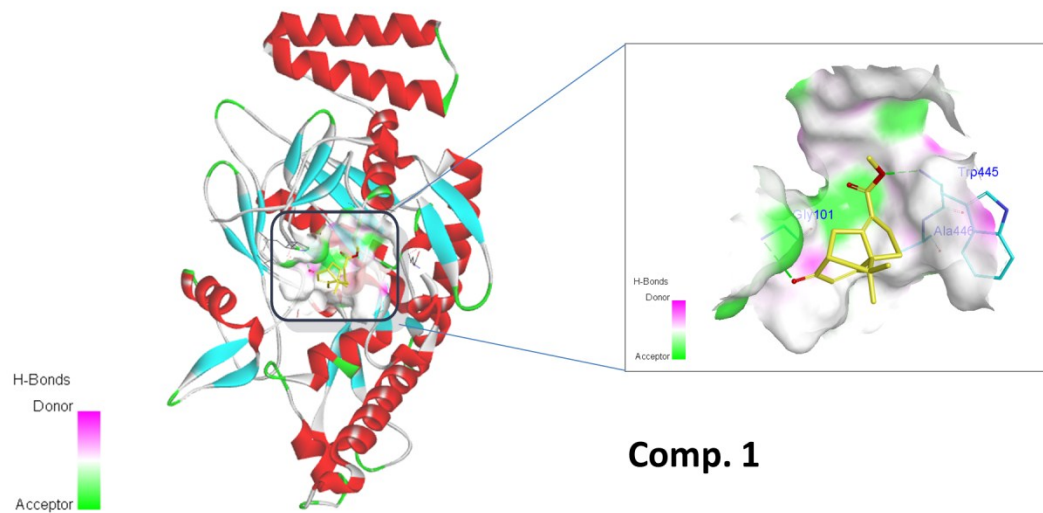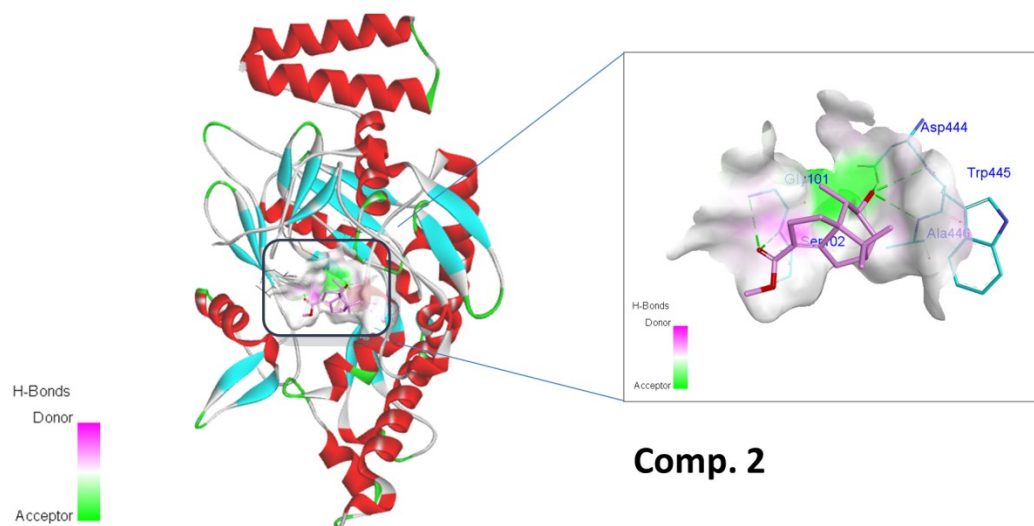

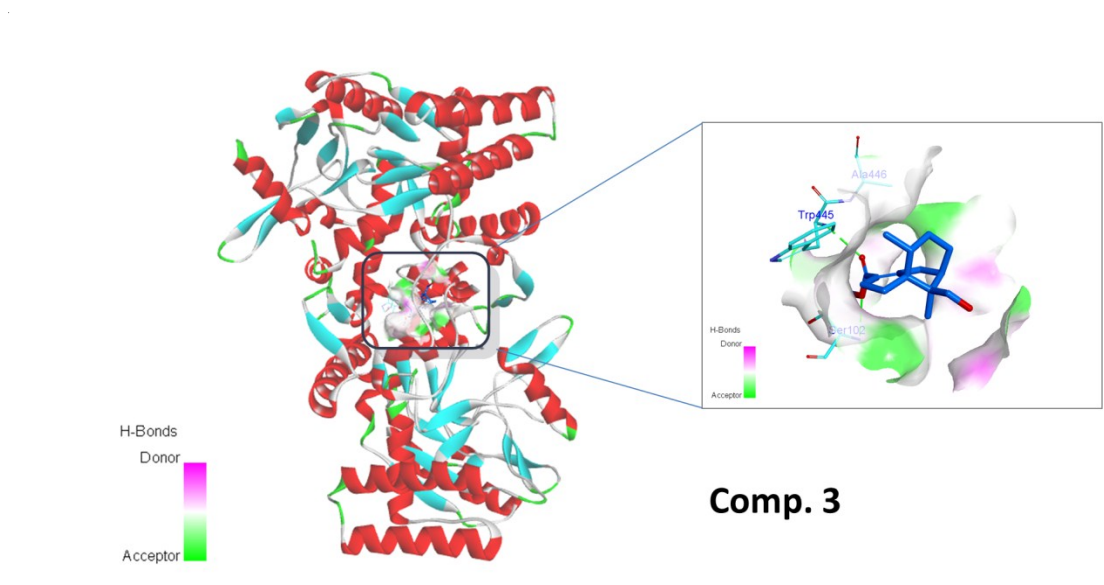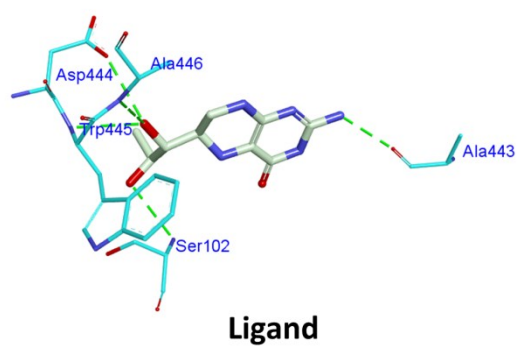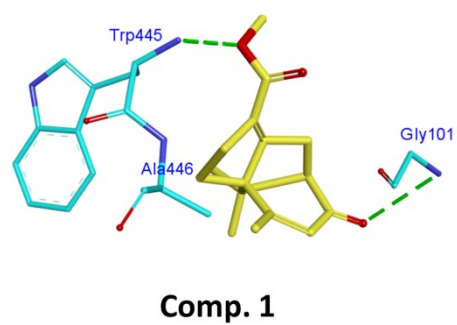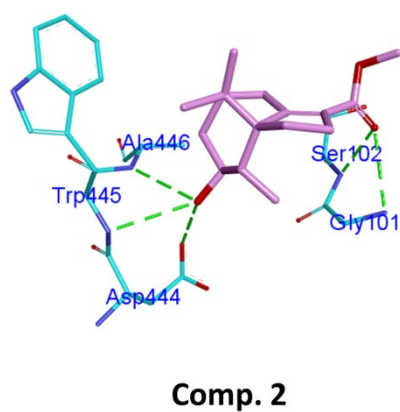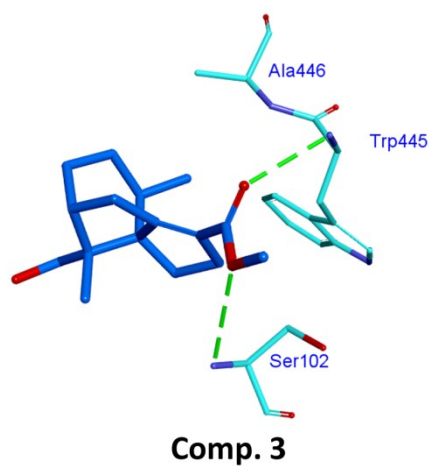

**Figure S64.** Comp. 1-3 and ligand bound to endothelial nitric oxide synthase (eNOS) (PDB code: 4D1P).

**Table S1** Antiplatelet aggregation activity of **MC** and biotransformation derivatives **1–8** ( $\bar{x} \pm s$ ,  $n = 3$ ).

| Samples   | Dosage (g mL <sup>-1</sup> ) | Inhibition rate (%) |
|-----------|------------------------------|---------------------|
| <b>MC</b> | 400                          | 43.01% $\pm$ 1.98   |
| <b>1</b>  | 400                          | 93.01% $\pm$ 2.38   |
| <b>2</b>  | 400                          | 96.37% $\pm$ 3.76   |
| <b>3</b>  | 400                          | 82.68% $\pm$ 2.21   |
| <b>4</b>  | 400                          | 35.75% $\pm$ 0.65   |
| <b>5</b>  | 400                          | 36.59% $\pm$ 0.75   |
| <b>6</b>  | 400                          | 25.42% $\pm$ 0.66   |
| <b>7</b>  | 400                          | 74.87% $\pm$ 1.32   |
| <b>8</b>  | 400                          | 65.37% $\pm$ 1.13   |
| Aspirin   | 400                          | 86.32% $\pm$ 1.96   |

**Table S2** Moldock Scores of the active compounds **1-3** and the ligand of eNOS.

| Name           | Score    |
|----------------|----------|
| Ligand         | -103.483 |
| Comp. <b>1</b> | -103.066 |
| Comp. <b>2</b> | -105.809 |
| Comp. <b>3</b> | -102.956 |

## Notes and references

1. D. M. Dudzinski, T. Michel, Life history of eNOS: Partners and Pathways. *Cardiovasc. Res.* 2007, **75**, 247-260.
2. X. L. Tan, Y. Q. Xue, T. Ma, X. F. Wang, J. J. Li, L.B. Lan, K. U. Malik, M. P. McDonald, A. M. Dopico and F. F. Liao, *Mol. Neurodegener.* 2015, **10**, 24-36.
3. H. G. Li and U. Forstermann, *Curr. Pharm. Design*, 2016, **22**, 3595–3606.
4. A. V. Lipeeva, M. V. Khvostov, D. S. Baev, M. M. Shakirov, T. G. Tolstikova and E. E. Shults, *Med. Chem.*, 2016, **12**, 674 – 683.
5. C. Wang, F. Yang, Z. H. Xu, D. Q. Shi, D. Y. Chen, J. Dai, N. Gu and Q. Jiang, *Thromb. Res.* 2013, **131**, 31–38.
